# Supplementary material for: Reviews and syntheses: Greenhouse gas emissions from drained organic forest soils – synthesizing data for site-specific emission factors for boreal and cool temperate regions
Source: Copernicus journal article supplement (doi:10.5194/bg-2023-89), 2023-06-07
Supplement: Supplementary file 1 [file bg-2023-89-supplement.pdf]

## S1. Data composition

Peer reviewed publications were used as the data source. Original data collection in the publications was by (i) inventories integrating change in soil C-stock, and (ii) CO<sub>2</sub> monitoring fluxes by (a) chamber technique and/or (b) by eddy covariance technique. All CH<sub>4</sub> and N<sub>2</sub>O fluxes monitored between soil and the atmosphere were by the chamber technique.

Basic criteria for CO<sub>2</sub>, CO<sub>2</sub>-C, CH<sub>4</sub> and N<sub>2</sub>O data inclusion to the database was:

- for soil inventory studies, estimate on soil C stock change averaging change over specified period of years was attainable,
- for eddy covariance studies, at least one annual soil CO<sub>2</sub> balance estimate was attainable,
- for chamber studies, at least one annual soil CO<sub>2</sub> balance estimate was attainable,
- for chamber studies, at least one annual or warm season soil total or soil heterotrophic cumulative CO<sub>2</sub> emission estimate with potential to form respective annual soil CO<sub>2</sub> balance estimate by using existing supplementary site-specific or site-type specific data was attainable,
- at least one annual soil CH<sub>4</sub> balance or warm season cumulative soil CH<sub>4</sub> flux estimate was attainable,
- at least one annual soil N<sub>2</sub>O balance or warm season cumulative soil N<sub>2</sub>O flux estimate was attainable.

Annual soil CO<sub>2</sub> balance estimates based on soil inventories were added into the database 'as is' basis. CO<sub>2</sub> flux monitoring data based on chamber techniques usually necessitated further processing (e.g., measures on litter production and decomposition rates, evaluation of flux contributions from root respiration and/or ground vegetation dark respiration) before the estimate quantified soil CO<sub>2</sub> balance. Such site specific or site-type specific supplementary data were collated from the relevant literature, authors and other specialists, and incorporated to CO<sub>2</sub> flux data (applied changes are listed in Table S1-1 and in Data repository). Forming annual soil CH<sub>4</sub> and N<sub>2</sub>O balance estimates in the data was less complicated because annualization was the only supplementary measure implemented to the estimates reported as cumulative warm season flux.

Annualization. For studies providing GHG flux estimate based on warm season measurements, we used coefficient to supplement relative cold season fluxes. As in IPCC (2014), this was made by adding flux-proportion of colder period GHG flux estimate which was based on the cold season (winter) measurements and flux estimates in boreal and subarctic peatlands. The values based on cold season flux proportion provided in Dise (1992), Alm et al. (1999), Aurela et al. (2002), Kim et al. (2007) and Leppälä et al. (2011). As the annualization coefficients we topped seasonal GHG flux estimate by 15.9% for CO<sub>2</sub>, by 16.7% for CH<sub>4</sub>, and 21.4% for N<sub>2</sub>O. Applied changes are listed in Table S1-1 and Table S1-2.

Root respiration subtraction from the total respiration. Likely the largest and most coherent database providing both site type specific soil total (R<sub>tot</sub>) and proportioned heterotrophic (R<sub>het</sub>) CO<sub>2</sub> emissions in drained organic soils is analysed in Ojanen et al. (2010), and the database was available for our analyses. We split flux data from Ojanen et al. (2010) into ombrotrophic (n= 12) and minerotrophic (n= 53) site types and tested linear regression between CO<sub>2</sub>tot that includes autotrophic respiration of tree root systems and CO<sub>2</sub>het from soil. The analysis resulted in following linear regressions (95% confidence limits) for heterotrophic CO<sub>2</sub>het emission:

emission =  $1.1 + 0.39 \times R_{tot}$  ( $R^2 = 0.641$ ,  $SE_{model} = 139$ ,  $SE_{coefficient} = 183$ ) for ombrotrophic sites and

emission =  $-1.55 + 0.52 \times R_{tot}$  ( $R^2 = 0.723$ ,  $SE_{model} = 217$ ,  $SE_{coefficient} = 124$ ) for minerotrophic sites.

These equations were applied to form CO<sub>2</sub>het from the provided CO<sub>2</sub>tot estimates in data where CO<sub>2</sub>het was not readily available, and these estimates are listed in Table S1-1.

Litter production and decomposition rates. Applied changes and data sources are shown in Table S1-1.

Relative data reliability weighting. We determined a weigh for each annual soil GHG balance estimate formed from closed chamber data on the basis of estimate relative reliability (i.e. 1= no major issues

with the estimate and 0.5 = estimate uncertainty increased) by considering spatial coverage of data collection at the field sites and origin and quality of data types used for compiling the estimate. Applied '0.5' weigh was applied to estimate based on low number of spatial replicates (<3) in study, and/or if the estimate included unknown or unquantified CO<sub>2</sub> sources (e.g., ground vegetation remaining inside the closed chamber forming unwanted CO<sub>2aut</sub> emission source), and/or the estimate value necessitated several (≥2) post-publication changes before forming soil GHG balance estimate. Applied relative reliability scores and changes are listed in Table S1-1. Annual soil GHG balance estimates from organic soil inventory method and EC method were given weight '1' because data collection and data components forming the estimate are based on quite uniform techniques in both methods, where peat inventory data averages soil C stock development of several years or decades and the data includes on-site collected data components only, and EC flux data has high temporal accuracy when combined with on-site collected biomass C stock data. Analyses utilizing relative data reliability weight, i.e., weighed means, are noted in respective text sections.

GHG flux data covering multiple years or multiple studies conducted at the same site. Each flux monitoring site was marked by an identification code based on coordinates and site description in the source data. If multiple estimates were available for a certain site in a specific year (e.g. from parallelly run monitoring in different projects), only one estimate was accepted based on completeness of the reporting in publications. If there were multi-annual flux estimates (i.e. estimates on separate years) for a site, all estimates were saved. Multi-annual soil GHG balance estimates (year-specific estimates over several years) were used in analyses studying soil GHG balance correlations with soil, vegetation and climate variables, and this is noted accordingly in the respective text sections. In other analyses, arithmetic averages or weighed soil GHG balance averages (single average for each site) were used, and this is noted accordingly in the respective text sections.

Publications included in the assessment are; (1) Ball et al., 2007; (2) Brumme et al., 1999; (3) Christensen et al., 2012; (4) Danevčič et al., 2010; (5) Eickenscheidt et al., 2014; (6) Ernfors et al., 2011; (7) Glenn et al., 1993; (8) Holz et al., 2016; (9) Huttunen et al., 2003a; (10) Klemedtsson et al., 2010; (11) Komulainen et al., 1998; (12) Korkiakoski et al., 2017; (13) Lohila et al., 2007; (14) Lohila et al., 2011; (15) Lupikis and Lazdins 2017; (16) Maljanen et al., 2003a; (17) Maljanen et al., 2003b; (18) Maljanen et al., 2006; (19) Maljanen et al., 2010; (20) Maljanen et al., 2012; (21) Maljanen et al., 2014; (22) Mander et al., 2008; (23) Martikainen et al., 1992; (24) Martikainen et al., 1993; (25) Martikainen et al., 1995b; (26) McNamara et al., 2008; (27) Meyer et al., 2013; (28) Minkkinen and Laine 1998; (29) Minkkinen and Laine 2006; (30) Minkkinen et al., 1999; (31) Minkkinen et al., 2007b; (32) Moilanen et al., 2012; (33) Mustamo et al., 2016; (34) Mäkiranta et al., 2007; (35) Nykänen et al., 1998; (36) Ojanen et al., 2010; (37) Ojanen et al., 2013; (38) Pihlatie et al., 2004; (39) Pitkänen et al., 2013; (40) Regina et al., 1998; (41) Saari et al., 2009; (42) Salm et al., 2012; (43) Sikström et al., 2009; (44) Silvola et al., 1996; (45) Simola et al., 2012; (46) Uri et al., 2017; (47) Weslien et al., 2009; (48) von Arnold et al., 2005a; (49) Väisänen et al., 2013; (50) Yamulki et al., 2013; (51) Komulainen et al., 1999; (52) von Arnold et al. 2005b; (53) Minkkinen et al., 2018; (54) Ojanen et al., 2019.

90 **Table S1-1.** Publications with quantified annual CO<sub>2</sub> balance (CO<sub>2</sub> and CO<sub>2e</sub>) estimates from drained organic forest soils in boreal and temperate regions.

| Site type/<br>Climate<br>region and<br>(Country) | Soil<br>type/<br>Soil nu-<br>trient<br>status <sup>(1)</sup> /<br>Domi-<br>nant<br>tree-<br>stand<br>type | Met<br>hod <sup>(2)</sup> | Included<br>C-<br>measures<br>for forming<br>annual soil<br>C balance | Additional<br>data needs<br>and (changes<br>made)                                                                                               | Notes                                                                                                                                                                                    | Weig<br>ht | Refer-<br>ence                        | Refer-<br>ence<br>num-<br>ber in<br>this<br>study |
|--------------------------------------------------|-----------------------------------------------------------------------------------------------------------|---------------------------|-----------------------------------------------------------------------|-------------------------------------------------------------------------------------------------------------------------------------------------|------------------------------------------------------------------------------------------------------------------------------------------------------------------------------------------|------------|---------------------------------------|---------------------------------------------------|
| Forest/<br>Temperate<br>(Estonia)                | Peat/<br>NuR/<br>Conifer,<br>Mixed                                                                        | CH                        | TOT <sub>Grs</sub>                                                    | Tree root res-<br>piration sub-<br>traction (as<br>described in<br>the text).<br>Ground vege-<br>tation dark<br>respiration<br>subtraction (-). | Annual<br>flux esti-<br>mate is<br>based on<br>median<br>values.<br>Ground<br>vegetation<br>contribu-<br>tion to the<br>flux forms<br>an uncer-<br>tainty.                               | 0.5        | Salm et<br>al.<br>(2012)              | 42                                                |
| Forest/<br>Temperate<br>(Sweden)                 | Peat/<br>NuP/<br>Conifer                                                                                  | CH                        | TOT <sub>Grs</sub>                                                    | Tree root res-<br>piration sub-<br>traction (as<br>described in<br>the text).<br>Ground vege-<br>tation dark<br>respiration<br>subtraction (-). | Ground<br>vegetation<br>contribu-<br>tion to the<br>flux forms<br>an uncer-<br>tainty. Es-<br>timates for<br>multiple<br>years.                                                          | 0.5        | Sik-<br>ström et<br>al.<br>(2009)     | 43                                                |
| Forest/<br>Temperate<br>(Estonia)                | Peat/<br>NuR/<br>Decidu-<br>ous                                                                           | CH                        | S <sub>rs</sub> ; L <sub>in/to</sub> ;<br>FR <sub>in/to</sub>         | -                                                                                                                                               | Trenched<br>plots.                                                                                                                                                                       | 1          | Uri et<br>al.<br>(2017)               | 46                                                |
| Forest/<br>Temperate<br>(Sweden)                 | Peat/<br>NuR/<br>Conifer                                                                                  | CH                        | TOT <sub>Grs</sub> ;<br>NPP <sub>tr</sub>                             | Tree root res-<br>piration sub-<br>traction (value<br>from literature<br>is used in the<br>publication).                                        | Forest<br>floor veg-<br>etation<br>contribu-<br>tions as-<br>sumed to<br>be negligi-<br>ble. Exact<br>numbers<br>for some<br>factors<br>available<br>from von<br>Arnold et<br>al. 2005c. | 0.5        | von Ar-<br>nold et<br>al..<br>(2005b) | 52                                                |

|                                          |                                          |     |                                           |                                                                                                                                           |                                                                                                    |     |                            |    |
|------------------------------------------|------------------------------------------|-----|-------------------------------------------|-------------------------------------------------------------------------------------------------------------------------------------------|----------------------------------------------------------------------------------------------------|-----|----------------------------|----|
| Forest/<br>Temperate<br>(Sweden)         | Peat/<br>NuR/<br>Deciduous               | CH  | TOT <sub>Grs</sub> ;<br>NPP <sub>tr</sub> | Tree root respiration subtraction (value from literature is used in the publication). Ground vegetation dark respiration subtraction (-). | Ground vegetation contribution to the soil C store change is not considered in the estimate.       | 0.5 | von Arnold et al. (2005a)  | 48 |
| Forest/<br>Temperate<br>(United Kingdom) | Peat/<br>NuP/<br>Conifer                 | CH  | TOT <sub>Grs</sub>                        | Tree root respiration subtraction (as described in the text). Ground vegetation dark respiration subtraction (-).                         | Ground vegetation contribution to the flux forms an uncertainty. Estimates for multiple years.     | 0.5 | Yamulki et al. (2013)      | 50 |
| Forest/<br>Temperate<br>(Latvia)         | Peat/<br>NuR/<br>Conifer                 | INV | -                                         | -                                                                                                                                         | -                                                                                                  | 1   | Lupikis and Lazdins (2017) | 15 |
| AF_AG/<br>Temperate<br>(Sweden)          | Peat/<br>NuR/<br>Conifer                 | CH  | TOT <sub>Grs</sub>                        | Tree root respiration subtraction (value from literature is used in the publication). Ground vegetation dark respiration subtraction (-). | Ground vegetation contribution to the flux forms an uncertainty. Estimates for multiple years.     | 0.5 | Klemedtsson et al. (2010)  | 10 |
| AF_AG/<br>Temperate<br>(Sweden)          | Peat/<br>NuR/<br>Conifer                 | CH  | TOT <sub>Grs</sub>                        | Tree root respiration subtraction (as described in the text). Ground vegetation dark respiration subtraction (-).                         | Ground vegetation contribution to the flux forms an uncertainty.                                   | 0.5 | Sikström et al. (2009)     | 43 |
| AF_AG/<br>Temperate<br>(Germany)         | Other organic soil/<br>NuR/<br>Deciduous | CH  | TOT <sub>Grs</sub>                        | -                                                                                                                                         | Annual flux estimate is based on median values. Autotrophic respiration contributions are based on | 0.5 | Mander et al., 2008        | 22 |

|                                                            |                                                   |    |                                                                |                                                                                                         |                                                                                              |     |                          |    |
|------------------------------------------------------------|---------------------------------------------------|----|----------------------------------------------------------------|---------------------------------------------------------------------------------------------------------|----------------------------------------------------------------------------------------------|-----|--------------------------|----|
|                                                            |                                                   |    |                                                                |                                                                                                         | literature values. Gas sampling procedures unclear.                                          |     |                          |    |
| AF_AG/<br>Temperate<br>(United Kingdom)                    | Other organic soil/<br>NuR/<br>Conifer            | CH | TOT <sub>Grs</sub> ; Di                                        | Tree root respiration subtraction (as described in the text).                                           | Ground vegetation assumed to be absent in closed canopy sites. Estimates for multiple years. | 1   | Ball et al. (2007)       | 1  |
| Forest/<br>Boreal<br>(Finland)                             | Peat/<br>NuR,<br>NuP(0)/<br>Conifer,<br>Deciduous | CH | S <sub>rs</sub> ; L <sub>in/to</sub>                           | Multiple values from literature is used in the estimate (-).                                            | Trenching by 25 cm depth reaching collar sleeve.                                             | 0.5 | Väisänen et al. (2013)   | 49 |
| Forest/<br>Boreal<br>(Finland)                             | Peat/<br>NuR,<br>NuP/<br>Conifer                  | CH | PA <sub>GV</sub> ; GV <sub>rs</sub>                            | Annualization (as described in the text).                                                               | Trenched plots. Low number of replicate plots.                                               | 0.5 | Komulainen et al. (1999) | 51 |
| Forest/<br>Boreal<br>(Finland)                             | Peat/<br>NuP/<br>Conifer                          | EC | NEE; TOT <sub>Ers</sub> ; NPP <sub>tr</sub> ; Di               | -                                                                                                       | -                                                                                            | 1   | Lohila et al. (2011)     | 14 |
| Forest/<br>Boreal<br>(Finland),<br>Temperate/<br>(Estonia) | Peat/<br>NuR,<br>NuP/<br>Conifer                  | CH | S <sub>rs</sub> ; Di                                           | Adding above- and belowground litter production and decomposition rates ( <sup>3</sup> ).               | Trenched plots.                                                                              | 1   | Minkkinen et al. (2007b) | 31 |
| Forest/<br>Boreal<br>(Finland)                             | Peat/<br>NuR/<br>Conifer                          | CH | S <sub>rs</sub> ; Di                                           | Adding above- and belowground litter production and decomposition rates ( <sup>4</sup> ).               | Trenched plots.                                                                              | 1   | Moilanen et al. (2012)   | 32 |
| Forest/<br>Boreal<br>(Finland)                             | Peat/<br>NuR/<br>Mixed                            | CH | G <sub>rs</sub> ; Di                                           | Annualization (as described in the text). Tree root respiration subtraction (as described in the text). | -                                                                                            | 0.5 | Mustamo et al. (2016)    | 33 |
| Forest/<br>Boreal<br>(Finland)                             | Peat/<br>NuR,<br>NuP/<br>Conifer,<br>Mixed,       | CH | TOT <sub>Grs</sub> ; S <sub>rs</sub> ; RS <sub>prop</sub> ; Di | Values from Ojanen et al., 2013                                                                         | Trenched and non-trenched plots in the study.                                                | 1   | Ojanen et al. (2010)     | 36 |

|                                |                                                                      |     |                                               |                                                               |                                                                 |   |                                    |    |
|--------------------------------|----------------------------------------------------------------------|-----|-----------------------------------------------|---------------------------------------------------------------|-----------------------------------------------------------------|---|------------------------------------|----|
|                                | Deciduous                                                            |     |                                               |                                                               |                                                                 |   |                                    |    |
| Forest/<br>Boreal<br>(Finland) | Peat/<br>NuR,<br>NuP/<br>Conifer,<br>Mixed,<br>Deciduous             | CH  | $L_{in/to}$ ; $FR_{in/to}$ ;<br>Di            | Values from<br>Ojanen et al.,<br>2010                         | -                                                               | 1 | Ojanen<br>et al.<br>(2013)         | 37 |
| Forest/<br>Boreal<br>(Finland) | Peat/<br>NuR,<br>NuP,<br>NuP(0)/<br>Conifer,<br>Deciduous            | CH  | $G_{rs}$ ; $L_{Ars}$                          | Tree root respiration subtraction (as described in the text). | Estimates for multiple years.                                   | 1 | Silvola<br>et al.<br>(1996)        | 44 |
| Forest/<br>Boreal<br>(Finland) | Peat/<br>NuR,<br>NuP/<br>Conifer,<br>Deciduous                       | INV | -                                             | -                                                             | -                                                               | 1 | Minkinen<br>and<br>Laine<br>(1998) | 28 |
| Forest/<br>Boreal<br>(Finland) | Peat/<br>NuR,<br>NuP,<br>NuP(0) /<br>Conifer                         | INV | -                                             | -                                                             | -                                                               | 1 | Minkinen<br>et al.,<br>(1999)      | 30 |
| Forest/<br>Boreal<br>(Finland) | Peat/<br>NuP(0) /<br>Conifer                                         | INV | -                                             | -                                                             | -                                                               | 1 | Pitkänen<br>et al.<br>(2013)       | 39 |
| Forest/<br>Boreal<br>(Finland) | Peat/<br>NuR,<br>NuR(0),<br>NuP,<br>NuP(0)/<br>Conifer,<br>Deciduous | INV | -                                             | -                                                             | -                                                               | 1 | Simola<br>et al.<br>(2012)         | 45 |
| Forest/<br>Boreal<br>(Finland) | Peat/<br>NuP/<br>Conifer                                             | EC  | NEE; $NPP_{tr}$ ;                             | -                                                             | -                                                               | 1 | Minkinen<br>et al.<br>(2018)       | 53 |
| Forest/<br>Boreal<br>(Finland) | Peat/<br>NuR,<br>NuR(0),<br>NuP/<br>Conifer,<br>Deciduous            | CH  | $S_{rs}$ ; $L_{in/to}$ ;<br>$FR_{in/to}$ ; Di | -                                                             | Trenched plots.                                                 | 1 | Ojanen<br>et al.<br>(2019)         | 54 |
| AF_AG/<br>Boreal<br>(Finland)  | Peat/<br>NuR/<br>Conifer                                             | EC  | NEE; $NPP_{tr}$ ;<br>Srs                      | -                                                             | Peat heterotrophic emission value for the site from publication | 1 | Lohila<br>et al.<br>(2007)         | 13 |

|                               |                                        |           |                                                                                          |                                                                                            |                                                                                                                                                              |     |                          |    |
|-------------------------------|----------------------------------------|-----------|------------------------------------------------------------------------------------------|--------------------------------------------------------------------------------------------|--------------------------------------------------------------------------------------------------------------------------------------------------------------|-----|--------------------------|----|
|                               |                                        |           |                                                                                          |                                                                                            | Mäkiranta et al. 2007.                                                                                                                                       |     |                          |    |
| AF_AG/<br>Boreal<br>(Sweden)  | Peat/<br>NuR/<br>Conifer               | EC,<br>CH | NEE; NPP <sub>tr</sub> ;<br>G <sub>rs</sub> ; S <sub>rs</sub> ;<br>L <sub>Ars</sub> ; Di | Adding above- and belowground litter production and decomposition rates in chamber method. | Trenched plots included. Two calculus approaches in the publication. Assumed equal annual production and decomposition of litter from both leaves and roots. | 1   | Meyer et al. (2013)      | 27 |
| AF_AG/<br>Boreal<br>(Finland) | Peat/<br>NuR/<br>Conifer,<br>Deciduous | CH        | S <sub>rs</sub>                                                                          | Adding above- and belowground litter production and decomposition rates ( <sup>5</sup> ).  | Trenched plots.                                                                                                                                              | 0.5 | Mäkiran ta et al. (2007) | 34 |
| AF_PM/<br>Boreal<br>(Finland) | Peat/<br>NuP/<br>Conifer,<br>Deciduous | CH        | Di; S <sub>rs</sub>                                                                      | Adding above- and belowground litter production and decomposition rates ( <sup>5</sup> ).  | Trenched plots.                                                                                                                                              | 0.5 | Mäkiran ta et al. (2007) | 34 |

**Abbreviations:**

TOT<sub>Grs</sub> = heterotrophic respiration in soil and litter, and autotrophic respiration contributions from ground vegetation above and belowground parts and from tree roots (i.e. ground level total respiration)

TOT<sub>Ers</sub> = heterotrophic respiration in soil and litter, and autotrophic respiration contributions from above and belowground parts of ground vegetation and trees (i.e. ecosystem level total respiration)

G<sub>rs</sub> = Heterotrophic respiration in soil (excluding recently deposited litter contribution) and autotrophic contributions from tree roots

S<sub>rs</sub> = Heterotrophic respiration in soil (excluding recently deposited litter contribution)

L<sub>Ars</sub> = Heterotrophic respiration in litter on the soil surface

RS<sub>prop</sub> = Proportion between autotrophic respiration from vegetation (trees) and heterotrophic respiration from soil decomposition

GV<sub>rs</sub> = Ground vegetation autotrophic respiration contributions from above and belowground parts

TR<sub>rs</sub> = Tree root autotrophic respiration contributions

L<sub>in/to</sub> = Litter increment and turnover on ground

FR<sub>in/to</sub> = Fine root production and turnover by trees and ground vegetation

NEE = Net ecosystem CO<sub>2</sub> exchange

NPP = Net primary production in ecosystem

NPP<sub>tr</sub> = Net primary production in trees

PA<sub>GV</sub> = Gross primary CO<sub>2</sub> assimilation in ground vegetation

Di = Flux estimate takes into account diurnal temperature variation by data modelling or by diurnal flux monitoring

<sup>(1)</sup> NuP = Nutrient poor, NuR = Nutrient rich, (0) = Poorly productive site type not classified as forest even if drained (i.e. FAO-forest)

<sup>(2)</sup> CH = flux monitoring by dark and light chambers, EC = eddy covariance method, INV = inventory method

<sup>(3)</sup> Minkkinen et al., (2007b) annual aboveground and belowground litter production and turnover on the sites based on best similarity with the site types in Ojanen et al. (2013), and the original flux was divided by 0.85 which proportionated removed loose litter decomposition share (15%) into the flux (see Ojanen et al., 2013).

<sup>(4)</sup> Moilanen et al., (2012) above- and belowground litter production and turnover was based on *Vaccinium myrtillus* (type II) forest in northern Finland (including 7 sites from Ojanen et al. (2010) data, and the original flux was divided by 0.85 which proportionated removed loose litter decomposition share (15%) into the flux (see Ojanen et al., 2013).

<sup>(5)</sup> Mäkiranta et al., (2007) litter production in trees based on site tree stock field survey form data available from the authors, which was converted to form tree stock on the sites, and thereafter the tree stock measures was modelled to form above- and belowground litter production as described in Repola (2008) and Repola (2009) and for litter turnover as described in Ojanen et al. (2014). Ground level vegetation data was available from Aro et al. (2016), field survey form data and other unpublished materials available from the authors, the original flux was divided by 0.85 which proportionated removed loose litter decomposition share (15%) into the flux (see Ojanen et al., 2013).



**Table S1-2.** Publications quantifying soil annual CH<sub>4</sub> and N<sub>2</sub>O flux balances from drained organic forest soils in boreal and temperate regions.

| <b>GHG type/<br/>Climate re-<br/>gion and<br/>(Country)</b>             | <b>Site<br/>type</b> | <b>Soil/<br/>Site nu-<br/>trient<br/>status<sup>(1)</sup>/<br/></b> | <b>Domi-<br/>nant<br/>tree-<br/>stand<br/>type</b> | <b>Addi-<br/>tional<br/>data<br/>need<br/>/(change<br/>s made)</b> | <b>Notes</b>                          | <b>Weigh<br/>t</b> | <b>Refer-<br/>ence</b>              | <b>Refer-<br/>ence<br/>number<br/>in this<br/>study</b> |
|-------------------------------------------------------------------------|----------------------|---------------------------------------------------------------------|----------------------------------------------------|--------------------------------------------------------------------|---------------------------------------|--------------------|-------------------------------------|---------------------------------------------------------|
| N <sub>2</sub> O/<br>Temperate<br>(Germany)                             | Forest               | Peat/<br>NuR/                                                       | Decidu-<br>ous                                     |                                                                    |                                       | 1                  | Brumme<br>et al.<br>(1999)          | 2                                                       |
| CH <sub>4</sub> , N <sub>2</sub> O/<br>Temperate<br>(Slovakia)          | Forest               | Peat/<br>NuP/                                                       | Mixed                                              |                                                                    |                                       | 1                  | Danevčič<br>et al.<br>(2010)        | 4                                                       |
| CH <sub>4</sub> /<br>Temperate<br>(Canada)                              | Forest               | Peat/<br>NuR/                                                       | Decidu-<br>ous,<br>Mixed                           | Annual-<br>ization                                                 |                                       | 1                  | Glenn et<br>al. (1993)              | 7                                                       |
| CH <sub>4</sub> , N <sub>2</sub> O/<br>Temperate<br>(Estonia)           | Forest               | Peat/<br>NuR/                                                       | Conifer,<br>Mixed                                  |                                                                    |                                       | 1                  | Salm et<br>al. (2012)               | 42                                                      |
| CH <sub>4</sub> /<br>Temperate<br>(Sweden)                              | Forest               | Peat/<br>NuP/                                                       | Conifer                                            |                                                                    |                                       | 1                  | Sikström<br>et al.<br>(2009)        | 43                                                      |
| CH <sub>4</sub> , N <sub>2</sub> O/<br>Temperate<br>(Sweden)            | Forest               | Peat/<br>NuR/                                                       | Decidu-<br>ous                                     |                                                                    |                                       | 1                  | von Ar-<br>nold et al.<br>(2005a)   | 48                                                      |
| CH <sub>4</sub> , N <sub>2</sub> O/<br>Temperate<br>(Sweden)            | Forest               | Peat/<br>NuR/                                                       | Conifer                                            |                                                                    |                                       | 1                  | von Ar-<br>nold et al.<br>(2005b)   | 52                                                      |
| CH <sub>4</sub> , N <sub>2</sub> O/<br>Temperate<br>(United<br>Kingdom) | Forest               | Peat/<br>NuP/                                                       | Conifer                                            |                                                                    | Estimates<br>for multi-<br>ple years. | 1                  | Yamulki<br>et al.<br>(2013)         | 50                                                      |
| N <sub>2</sub> O/<br>Temperate<br>(Germany)                             | AF_AG                | Peat/<br>NuR/                                                       | Decidu-<br>ous                                     |                                                                    |                                       | 1                  | Eicken-<br>scheidt et<br>al. (2014) | 5                                                       |
| N <sub>2</sub> O/<br>Temperate<br>(Sweden)                              | AF_AG                | Peat/<br>NuR/                                                       | Conifer                                            |                                                                    | Estimates<br>for multi-<br>ple years. | 1                  | Ernfors et<br>al. (2011)            | 6                                                       |
| N <sub>2</sub> O/<br>Temperate<br>(Sweden)                              | AF_AG                | Peat/<br>NuR/                                                       | Conifer                                            |                                                                    | Estimates<br>for multi-<br>ple years. | 1                  | Holz et al.<br>(2016)               | 8                                                       |
| CH <sub>4</sub> , N <sub>2</sub> O/<br>Temperate<br>(Sweden)            | AF_AG                | Peat/<br>NuR/                                                       | Conifer                                            |                                                                    | Estimates<br>for multi-<br>ple years. | 1                  | Klemedts-<br>son et al.<br>(2010)   | 10                                                      |
| CH <sub>4</sub> , N <sub>2</sub> O/<br>Temperate<br>(Sweden)            | AF_AG                | Peat/<br>NuR/                                                       | Conifer                                            |                                                                    |                                       | 1                  | Sikström<br>et al.<br>(2009)        | 43                                                      |
| CH <sub>4</sub> , N <sub>2</sub> O/<br>Temperate<br>(Sweden)            | AF_AG                | Peat/<br>NuR/                                                       | Decidu-<br>ous                                     |                                                                    | Estimates<br>for multi-<br>ple years. | 1                  | Weslien<br>et al.<br>(2009)         | 47                                                      |
| CH <sub>4</sub> , N <sub>2</sub> O/<br>Temperate                        | AF_AG                | Other<br>organic<br>soil/                                           | Conifer                                            |                                                                    | Estimates<br>for multi-<br>ple years. | 1                  | Ball et al.<br>(2007)               | 1                                                       |

|                                                               |        |                                   |                                |                    |                                                                                                                                                            |     |                                     |    |
|---------------------------------------------------------------|--------|-----------------------------------|--------------------------------|--------------------|------------------------------------------------------------------------------------------------------------------------------------------------------------|-----|-------------------------------------|----|
| (United Kingdom)                                              |        | NuR/                              |                                |                    |                                                                                                                                                            |     |                                     |    |
| CH <sub>4</sub> , N <sub>2</sub> O/<br>Temperate<br>(Denmark) | AF_AG  | Other<br>organic<br>soil/<br>NuR/ | Decidu-<br>ous                 |                    |                                                                                                                                                            | 1   | Christiansen et al. (2012)          | 3  |
| CH <sub>4</sub> , N <sub>2</sub> O/<br>Temperate<br>(Germany) | AF_AG  | Other<br>organic<br>soil/<br>NuR/ | Decidu-<br>ous                 |                    |                                                                                                                                                            | 1   | Mander et al. (2008)                | 22 |
| CH <sub>4</sub> /<br>Temperate<br>(United Kingdom)            | AF_AG  | Other<br>organic<br>soil/<br>NuR/ | Conifer                        |                    |                                                                                                                                                            | 1   | McNamar a et al. (2008)             | 26 |
| CH <sub>4</sub> , N <sub>2</sub> O/<br>Boreal<br>(Finland)    | Forest | Peat/<br>NuR/                     | Conifer,<br>cleared<br>conifer |                    | Low<br>number of<br>replicate<br>plots.                                                                                                                    | 0.5 | Huttunen et al. (2003a)             | 9  |
| CH <sub>4</sub> /<br>Boreal<br>(Finland)                      | Forest | Peat/<br>NuR/                     | Conifer,<br>cleared            | Annual-<br>ization | Seasonal<br>flux esti-<br>mates<br>listed as<br>annual esti-<br>mates.<br>Estimates<br>for multi-<br>ple years.<br>Low<br>number of<br>replicate<br>plots. | 0.5 | Komulainen et al. (1998)            | 11 |
| CH <sub>4</sub> /<br>Boreal<br>(Finland)                      | Forest | Peat/<br>NuR/                     | Mixed                          |                    | Estimates<br>for multi-<br>ple years.                                                                                                                      | 1   | Korkiakoski et al. (2017)           | 12 |
| CH <sub>4</sub> , N <sub>2</sub> O/<br>Boreal<br>(Finland)    | Forest | Peat/<br>NuP/                     | Conifer                        |                    |                                                                                                                                                            | 1   | Lohila et al. (2011)                | 14 |
| CH <sub>4</sub> /<br>Boreal<br>(Finland)                      | Forest | Peat/<br>NuR/                     | Decidu-<br>ous                 |                    |                                                                                                                                                            | 1   | Maljanen et al. (2003a)             | 16 |
| N <sub>2</sub> O/<br>Boreal<br>(Finland)                      | Forest | Peat/<br>NuR/                     | Decidu-<br>ous                 |                    |                                                                                                                                                            | 1   | Maljanen et al. (2003b)             | 17 |
| CH <sub>4</sub> , N <sub>2</sub> O/<br>Boreal<br>(Finland)    | Forest | Peat/<br>NuR,<br>NuP/             | Conifer                        |                    |                                                                                                                                                            | 1   | Maljanen et al. (2006)              | 18 |
| CH <sub>4</sub> , N <sub>2</sub> O/<br>Boreal<br>(Finland)    | Forest | Peat/<br>NuR/                     | Mixed                          |                    |                                                                                                                                                            | 1   | Maljanen et al. (2010)              | 19 |
| CH <sub>4</sub> , N <sub>2</sub> O/<br>Boreal<br>(Finland)    | Forest | Peat<br>NuP(0),<br>NuP/           | Conifer                        |                    | Estimates<br>for multi-<br>ple years.                                                                                                                      | 1   | Maljanen et al. (2014) <sup>2</sup> | 21 |
| CH <sub>4</sub> /<br>Boreal                                   | Forest | Peat/<br>NuR,<br>NuP/             | Conifer                        |                    | Low<br>number of                                                                                                                                           | 0.5 | Martikainen                         | 23 |

|                                                            |        |                                                 |                                 |               |                                                                            |         |                            |    |
|------------------------------------------------------------|--------|-------------------------------------------------|---------------------------------|---------------|----------------------------------------------------------------------------|---------|----------------------------|----|
| (Finland)                                                  |        |                                                 |                                 |               | replicate plots.                                                           |         | et al., 1992               |    |
| N <sub>2</sub> O/<br>Boreal<br>(Finland)                   | Forest | Peat/<br>NuR,<br>NuR(0),<br>NuP,<br>NuP(0)<br>/ | Conifer                         |               |                                                                            |         | Martikainen et al. (1993)  | 24 |
| CH <sub>4</sub> /<br>Boreal<br>(Finland)                   | Forest | Peat/<br>NuR/                                   | Conifer                         |               | Estimates for multiple years.                                              | 1       | Martikainen et al. (1995b) | 25 |
| CH <sub>4</sub> /<br>Boreal<br>(Finland)                   | Forest | Peat/<br>NuR,<br>NuP(0)<br>/                    | Conifer                         |               |                                                                            | 1       | Minkinen and Laine (2006)  | 29 |
| CH <sub>4</sub> , N <sub>2</sub> O/<br>Boreal<br>(Finland) | Forest | Peat/<br>NuR/                                   | Mixed                           | Annualization | Low number of replicate plots.                                             | 0.5     | Mustamo et al. (2016)      | 33 |
| CH <sub>4</sub> /<br>Boreal<br>(Finland)                   | Forest | Peat/<br>NuR,<br>NuP,<br>NuP(0)/                | Conifer,<br>Deciduous           |               | Estimates for multiple years. Low number of replicate plots at some sites. | 0.5 & 1 | Nykänen et al. (1998)      | 35 |
| CH <sub>4</sub> , N <sub>2</sub> O/<br>Boreal<br>(Finland) | Forest | Peat/<br>NuR,<br>NuP/                           | Conifer,<br>Mixed,<br>Deciduous |               |                                                                            | 1       | Ojanen et al. (2010, 2018) | 36 |
| N <sub>2</sub> O/<br>Boreal<br>(Finland)                   | Forest | Peat/<br>NuR/                                   | Mixed                           |               |                                                                            | 1       | Regina et al. (1998)       | 40 |
| CH <sub>4</sub> , N <sub>2</sub> O/<br>Boreal<br>(Finland) | Forest | Peat/<br>NuR/                                   | Cleared conifer                 |               | Estimates for multiple years.                                              | 1       | Saari et al. (2009)        | 41 |
| CH <sub>4</sub> , N <sub>2</sub> O/<br>Boreal<br>(Finland) | Forest | Peat/<br>NuR,<br>NuP(0)<br>/                    | Conifer,<br>Deciduous           |               | Number of replicate plots at the sites unclear.                            | 0.5     | Väisänen et al. (2013)     | 49 |
| CH <sub>4</sub> /<br>Boreal<br>(Finland)                   | Forest | Peat/<br>NuP/                                   | Conifer                         |               |                                                                            | 1       | Minkinen et al. (2018)     | 53 |
| CH <sub>4</sub> , N <sub>2</sub> O/<br>Boreal<br>(Finland) | Forest | Peat/<br>NuR,<br>NuR(0),<br>NuP/                | Conifer,<br>Deciduous           |               |                                                                            | 1       | Ojanen et al. (2019)       | 54 |
| N <sub>2</sub> O/<br>Boreal<br>(Finland)                   | AF_PM  | Peat/<br>NuP/                                   | Conifer,<br>Deciduous           |               | Low number of replicate plots at                                           | 0.5 & 1 | Maljanen et al. (2012)     | 20 |

|                                                                                                                                                                                                                                                                                        |       |               |                            |  |                                         |     |                               |    |
|----------------------------------------------------------------------------------------------------------------------------------------------------------------------------------------------------------------------------------------------------------------------------------------|-------|---------------|----------------------------|--|-----------------------------------------|-----|-------------------------------|----|
|                                                                                                                                                                                                                                                                                        |       |               |                            |  | some sites.                             |     |                               |    |
| CH <sub>4</sub> , N <sub>2</sub> O/<br>Boreal<br>(Finland)                                                                                                                                                                                                                             | AF_PM | Peat/<br>NuP/ | Conifer,<br>Decidu-<br>ous |  |                                         | 1   | Mäkiranta<br>et al.<br>(2007) | 34 |
| N <sub>2</sub> O<br>Boreal<br>(Finland)                                                                                                                                                                                                                                                | AF_AG | Peat/<br>NuR/ | Conifer,<br>Decidu-<br>ous |  |                                         | 1   | Maljanen<br>et al.<br>(2012)  | 20 |
| CH <sub>4</sub> , N <sub>2</sub> O/<br>Boreal<br>(Finland)                                                                                                                                                                                                                             | AF_AG | Peat/<br>NuR/ | Conifer                    |  | Low<br>number of<br>replicate<br>plots. | 0.5 | Meyer et<br>al. (2013)        | 27 |
| CH <sub>4</sub> , N <sub>2</sub> O/<br>Boreal<br>(Finland)                                                                                                                                                                                                                             | AF_AG | Peat/<br>NuR/ | Conifer,<br>Decidu-<br>ous |  |                                         | 1   | Mäkiranta<br>et al.<br>(2007) | 34 |
| N <sub>2</sub> O/<br>Boreal<br>(Finland)                                                                                                                                                                                                                                               | AF_AG | Peat/<br>NuR/ | Conifer                    |  |                                         | 1   | Pihlatie et<br>al. (2004)     | 38 |
| <sup>(1)</sup> NuP = Nutrient poor, NuR = Nutrient rich, (0) = Poorly productive site type not classified as forest even if drained (i.e. FAO-forest)<br><sup>(2)</sup> According to given site classification sites are nutrient poor but characteristics indicate nutrient rich site |       |               |                            |  |                                         |     |                               |    |

95

## References

- Alm, J., Saarnio, S., Nykänen, H., Silvola, J., and Martikainen, P. J.: Winter CO<sub>2</sub>, CH<sub>4</sub> and N<sub>2</sub>O fluxes on some natural and drained boreal peatlands. *Biogeochemistry*, 44, 163–186, <https://doi.org/10.1023/A:1006074606204>, 1999.
- 100 Aro, L., Hotanen, J.-P., and Nousiainen, H.: Suonpohjan viljavuuden arviointi turveanalyysin, kasvillisuuskuvausten ja puuston kasvun perusteella. *Suo*, 67: 7–10, 2016.
- Aurela, M., Laurila, T., and Tuovinen, J.-P.: Annual CO<sub>2</sub> balance of a subarctic fen in northern Europe: Importance of the wintertime efflux. *J. Geophys. Res.*, 107(D21), 4607, <https://doi.org/10.1029/2002JD002055>, 2002.
- 105 Ball, T., Smith, K. A., and Moncrieff, J. B.: Effect of stand age on greenhouse gas fluxes from a Sitka spruce [*Picea sitchensis* (Bong.) Carr.] chronosequence on a peaty gley soil. *Global Change Biol.*, 13, 2128–2142, <https://doi.org/10.1111/j.1365-2486.2007.01427.x>, 2007.
- Brumme, R., Borker, W., and Finke, S.: Hierarchical control on nitrous oxide emissions in forest ecosystems. *Global Biogeochem. Cyc.*, 13, 1137–1148, <https://doi.org/10.1029/1999GB900017>, 1999.
- 110 Christiansen, J. R., Vesterdal, L., and Gundersen, P.: Nitrous oxide and methane exchange in two small temperate forest catchments – effects of hydrological gradients and implications for global warming potentials of forest soils. *Biogeochemistry*, 107, 437–454, <https://doi.org/10.1007/s10533-010-9563-x>, 2012.
- 115 Danevčič, T., Mandić-Mulec, I., Stres, B., Stopar, D., and Hacin, J.: Emissions of CO<sub>2</sub>, CH<sub>4</sub> and N<sub>2</sub>O from Southern European peatlands. *Soil Biol. Biochem.*, 42, 1437–1446, <https://doi.org/10.1016/j.soilbio.2010.05.004>, 2010.
- Dise, N. B.: Winter fluxes of methane from Minnesota peatlands. *Biogeochemistry*, 17, 71–83, <https://doi.org/10.1007/BF00002641>, 1992.
- 120 Eickenscheidt, T., Heinichen, J., Augustin, J., Freibauer, A., and Drösler, M.: Nitrogen mineralization and gaseous nitrogen losses from waterlogged and drained organic soils in a black alder (*Alnus glutinosa* (L.) Gaertn.) forest. *Biogeosciences*, 11, 2961–2976, <https://doi.org/10.5194/bg-11-2961-2014>, 2014.

- Ernfors, M., Rütting T, and Klemedtsson, L.: Increased nitrous oxide emissions from a drained organic forest soil after exclusion of ectomycorrhizal mycelia. *Plant Soil*, 343, 161–170, <https://doi.org/10.1007/s11104-010-0667-9>, 2011.
- 125 Glenn, S., Heyes, A., and Moore, T.: Carbon dioxide and methane fluxes from drained peat soils, Southern Quebec. *Global Biogeochem. Cy.*, 7, 247–257, <https://doi.org/10.1029/93GB00469>, 1993.
- Holz, M., Aurangojeb, M., Kasimir, Å., Boeckx, P., Kuzyakov, Y., Klemedtsson, L., and Rütting, T.: Gross Nitrogen Dynamics in the Mycorrhizosphere of an Organic Forest Soil. *Ecosystems* 19(2), 284–295, <https://doi.org/10.1007/s10021-015-9931-4>, 2016.
- 130 Huttunen, J. T., Nykänen, H., Martikainen, P. J., and Nieminen, M.: Fluxes of nitrous oxide and methane from drained peatlands following forest clear-felling in southern Finland. *Plant Soil*, 255, 457–462, <https://doi.org/10.1023/A:1026035427891>, 2003.
- 135 IPCC (2014). 2013 Supplement to the 2006 IPCC Guidelines for National Greenhouse Gas Inventories: Wetlands, Hiraishi, T., Krug, T., Tanabe, K., Srivastava, N., Baasansuren, J., Fukuda, M., and Troxler, T. G. (eds). Published: IPCC, Switzerland. 353 p., <https://www.ipcc-nggip.iges.or.jp/public/wetlands/>, 2014.
- Kim, Y., Ueyama, M., Nakagawa, F., Tsunogai, U., Harazono, Y., and Tanaka, N.: Assessment of winter fluxes of CO<sub>2</sub> and CH<sub>4</sub> in boreal forest soils of central Alaska estimated by the profile method and the chamber method: a diagnosis of methane emission and implications for the regional carbon budget. *Tellus*, 59B, 223–233, <https://doi.org/10.1111/j.1600-0889.2006.00233.x>, 2007.
- 140 Klemedtsson, L., Ernfors, M., Björk, R. G., Weslien, P., Rütting, T., Crill, P., and Sikström, U.: Reduction of greenhouse gas emissions by wood ash application to a *Picea abies* (L.) Karst. forest on a drained organic soil. *Eur. J. Soil Sci.*, 61, 734–744, <https://doi.org/10.1111/j.1365-2389.2010.01279.x>, 2010.
- 145 Komulainen, V.-M., Nykänen, H., and Martikainen, P. J., Laine, J.: Short-term effect of restoration on vegetation change and methane emissions from peatlands drained for forestry in southern Finland. *Can. J. Forest Res.*, 28(3), 402–411, <https://doi.org/10.1139/x98-011>, 1998.
- 150 Komulainen, V.-M., Tuittila, E.-S., Vasander, H., and Laine, J.: Restoration of drained peatlands in southern Finland: initial effects on vegetation change and CO<sub>2</sub> balance. *J. Appl. Ecol.*, 36, 634–648, <https://doi.org/10.1046/j.1365-2664.1999.00430.x>, 1999.
- Korkiakoski, M., Tuovinen, J.-P., Aurela, M., Koskinen, M., Minkkinen, K., Ojanen, P., Penttilä, T., Rainne, J., Laurila, T., and Lohila, A.: Methane exchange at the peatland forest floor – automatic chamber system exposes the dynamics of small fluxes. *Biogeosciences*, 14, 1947–1967, <https://doi.org/10.5194/bg-14-1947-2017>, 2017.
- 155 Laine, J., Minkkinen, K., Sinisalo, J., Savolainen, I., and Martikainen, P. J.: Greenhouse impact of a mire after drainage for forestry. In: Northern Forested Wetlands, Ecology and Management, (eds) C. C. Trettin, M. F. Jurgensen, D. F. Grigal, M. R. Gale, and J. K. Jeglum, Boca Raton, FL, USA: CRC Lewis Publishers., pp. 437–447, <https://doi.org/10.1201/9780203745380-31>, 1996.
- 160 Leppälä, M., Laine, A. M., and Tuittila, E.-S.: Winter carbon losses from a boreal mire succession sequence follow summertime patterns in carbon dynamics. *Suo*, 62(1), 1–11, [www.suo.fi/pdf/article9874.pdf](http://www.suo.fi/pdf/article9874.pdf), 2011.
- 165 Lohila A., Laurila T., Aro L., Aurela, M., Tuovinen J.-P., Laine J., Kolari P., and Minkkinen K.: Carbon dioxide exchange above a 30-year-old Scots pine plantation established on organic-soil cropland. *Boreal Environ. Res.*, 12, 141–157, [www.borenv.net/BER/pdfs/ber12/ber12-141.pdf](http://www.borenv.net/BER/pdfs/ber12/ber12-141.pdf), 2007.
- Lohila, A., Minkkinen, K., Aurela, M., Tuovinen, J.-P., Penttilä, T., and Laurila, T.: Greenhouse gas flux measurements in a forestry-drained peatland indicate a large carbon sink. *Biogeosciences*, 8, 3203–3218, <https://doi.org/10.5194/bg-8-3203-2011>, 2011.
- 170 Lupikis, A. and Lazdins, A.: Soil carbon stock changes in transitional mire drained for Forestry in Latvia: a case study. *Res. Rural Dev.*, 1, 55–61, <https://doi.org/10.22616/rrd.23.2017.008>, 2017.

- 175 Maljanen, M., Hytönen, J., and Martikainen, P. J.: Cold-season nitrous oxide dynamics in a drained boreal peatland differ depending on land-use practice. *Can. J. Forest Res.*, 40, 565–572, <https://doi.org/10.1139/X10-004>, 2010.
- Maljanen, M., Liikanen, A., Silvola, J., and Martikainen, P. J.: Methane fluxes on agricultural and forested boreal organic soils. *Soil Use Manage.*, 19, 73–79, <https://doi.org/10.1111/j.1475-2743.2003.tb00282.x>, 2003a.
- 180 Maljanen, M., Liikanen, A., Silvola, J., and Martikainen, P. J.: Nitrous oxide emissions from boreal organic soil under different land-use. *Soil Biol. Biochem.*, 35, 689–700, [https://doi.org/10.1016/S0038-0717\(03\)00085-3](https://doi.org/10.1016/S0038-0717(03)00085-3), 2003b.
- Maljanen, M., Liimatainen, M., Hytönen, J., Martikainen, P. J.: The effect of granulated wood-ash fertilization on soil properties and greenhouse gas (GHG) emissions in boreal peatland forests. *Boreal Environ. Res.*, 19, 295–309, [www.borenv.net/BER/pdfs/ber19/ber19-295.pdf](http://www.borenv.net/BER/pdfs/ber19/ber19-295.pdf), 2014.
- 185 Maljanen, M., Nykänen, H., Moilanen, M., and Martikainen, P. J.: Greenhouse gas fluxes of coniferous forest floors affected by wood ash fertilization. *For. Ecol. Man.*, 237, 143–149, <https://doi.org/10.1111/10.1016/j.foreco.2006.09.039>, 2006.
- Maljanen, M., Shurpali, N., Hytönen, J., Mäkiranta, P., Aro, L., Potila, H., Laine, J., Li, C., and Martikainen, P. J.: Afforestation does not necessarily reduce nitrous oxide emissions from managed boreal peat soils. *Biogeochemistry*, 108, 199–218, <https://doi.org/10.1007/s10533-011-9591-1>, 2012.
- 190 Mander, Ü., Löhmus, K., Teiter, S., Uri, V., and Augustin, J.: Gaseous nitrogen and carbon fluxes in riparian alder stands. *Boreal Environ. Res.*, 13, 231–241, [www.borenv.net/BER/pdfs/ber13/ber13-231.pdf](http://www.borenv.net/BER/pdfs/ber13/ber13-231.pdf), 2008.
- Martikainen, P. J., Nykänen, H., Crill, P., and Silvola, J.: The effect of changing water table on methane fluxes at two Finnish mire sites. *Suo*, 43, 237–240, <http://www.suo.fi/article/9712>, 1992.
- 195 Martikainen, P. J., Nykänen, H., Crill, P., and Silvola, J.: Effect of a lowered water table on nitrous oxide fluxes from northern peatlands. *Nature*, 366, 51–53, <https://doi.org/10.1038/366051a0>, 1993.
- Martikainen, P. J., Nykänen, H., Regina, K., Lehtonen, M., and Silvola, J.: Methane fluxes in a drained and forested peatland treated with different nitrogen compounds, in: *Northern Peatlands in Global Climatic Change*. Laiho, R., Laine, J. and Vasander, H. (eds). Proceedings of the International Workshop Held in Hyytiälä, Finland. Helsinki, pp. 105–109, 1995b.
- 200 McNamara, N. P., Black, H. I. J., Pearce, T. G., Reay, D. S., and Ineson, P.: The influence of afforestation and tree species on soil methane fluxes from shallow organic soils at the UK Gisburn Forest Experiment. *Soil Use Manage.*, 24, 1–7, <https://doi.org/10.1111/j.1475-2743.2008.00147.x>, 2008.
- 205 Meyer, A., Tarvainen, L., Nouratpour, A., Björk, R. G., Ernfors, M., Grelle, A., Kasimir Klemmedtsson, Å., Lindroth, A., Rantfors, M., Rütting, T., Wallin, G., Weslien, P., and Klemmedtsson, L.: A fertile peatland forest does not constitute a major greenhouse gas sink. *Biogeosciences*, 10, 7739–7758, <https://doi.org/10.5194/bg-10-7739-2013>, 2013.
- 210 Minkkinen, K. and Laine, J.: Long-term effect of forest drainage on the peat carbon stores of pine mires in Finland. *Can. J. For. Res.*, 28, 1267–1275, <https://doi.org/10.1139/x98-104>, 1998.
- Minkkinen, K. and Laine, J.: Vegetation heterogeneity and ditches create spatial variability in methane fluxes from peatlands drained for forestry. *Plant Soil*, 285, 289–304, <https://doi.org/10.1007/s11104-006-9016-4>, 2006.
- 215 Minkkinen, K., Laine, J., Shurpali, N. J., Mäkiranta, P., Alm, J., and Penttilä, T.: Heterotrophic soil respiration in forestry-drained peatlands. *Boreal Environ. Res.*, 12, 115–126, [www.borenv.net/BER/pdfs/ber12/ber12-115.pdf](http://www.borenv.net/BER/pdfs/ber12/ber12-115.pdf), 2007b.
- Minkkinen, K., Ojanen, P., Penttilä, T., Aurela, M., Laurila, T., Tuovinen, J.-P., and Lohila, A.: Persistent carbon sink at a boreal drained bog forest. *Biogeosciences*, 15, 3603–3624, <https://doi.org/10.5194/bg-15-3603-2018>, 2018.
- 220

- Minkkinen, K., Vasander, H., Jauhiainen, S., Karsisto, M., and Laine, J.: Post-drainage changes in vegetation composition and carbon balance in Lakkasuo mire, Central Finland. *Plant Soil*, 207, 107–120, <https://doi.org/10.1023/A:1004466330076>, 1999.
- 225 Moilanen, M., Hytönen, J., and Leppälä, M.: Application of wood ash accelerates soil respiration and tree growth on drained peatland. *Eur. J. Soil Sci.*, 63, 467–475, <https://doi.org/10.1111/j.1365-2389.2012.01467.x>, 2012.
- Mustamo, P., Maljanen, M., Hyvärinen, M., Ronkainen, A.-K., and Kløve, B.: Respiration and emissions of methane and nitrous oxide from a boreal peatland complex comprising different land-use types. *Boreal Environ. Res.*, 12, 405–426, [www.borenv.net/BER/pdfs/ber21/ber21-405.pdf](http://www.borenv.net/BER/pdfs/ber21/ber21-405.pdf), 2016.
- 230 Mäkiranta, P., Hytönen, J., Aro, L., Maljanen, M., Pihlatie, M., Potila, H., Shurpali, N. J., Laine, J., Lohila, A., Martikainen, P.J., and Minkkinen, K.: Soil greenhouse gas emissions from afforested organic soil croplands and peat extraction peatlands. *Boreal Environ. Res.*, 12, 159–175, [www.borenv.net/BER/archive/pdfs/ber12/ber12-159.pdf](http://www.borenv.net/BER/archive/pdfs/ber12/ber12-159.pdf), 2007.
- 235 Nykänen, H., Alm, J., Silvola, J., Tolonen, K., and Martikainen, P. J.: Methane fluxes on boreal peatlands of different fertility and the effect of long term experimental lowering of the water table on flux rates. *Global Biogeochem. Cy.*, 12, 53–69, <https://doi.org/10.1029/97GB02732>, 1998.
- Ojanen, P., Minkkinen, K., Alm, J., and Penttilä, T.: Soil – atmosphere CO<sub>2</sub>, CH<sub>4</sub> and N<sub>2</sub>O fluxes in boreal forestry-drained peatlands. *Forest Ecol. Manag.*, 260, 411–421, <https://doi.org/10.1016/j.foreco.2010.04.036>, 2010.
- 240 Ojanen, P., Minkkinen, K., Alm, J., and Penttilä, T.: Corrigendum to “Soil–atmosphere CO<sub>2</sub>, CH<sub>4</sub> and N<sub>2</sub>O fluxes in boreal forestry-drained peatlands” [*For. Ecol. Manage.*, 260, 411–421, 2010], <https://doi.org/10.1016/j.foreco.2018.01.020>, 2018.
- Ojanen, P., Minkkinen, K., and Penttilä, T.: The current greenhouse impact of forestry-drained peatlands. *For. Ecol. Man.*, 289: 201–208, <https://doi.org/10.1016/j.foreco.2012.10.008>, 2013.
- 245 Ojanen, P., Penttilä, T., Tolvanen, A., Hotanen, J.-P., Saarimaa, M., Nousiainen, H., Minkkinen, K.: Long-term effect of fertilization on the greenhouse gas exchange of low-productive peatland forests. *For. Ecol. Man.*, 432, 786–798, <https://doi.org/10.1016/j.foreco.2018.10.015>, 2019.
- 250 Pihlatie, M., Rinne, J., Lohila, A., Laurila, T., Aro, L., and Vesala, T.: Nitrous oxide emissions from an afforested peat field using eddy covariance and enclosure techniques. In: J. Päivänen et al. (eds.), *Proceedings of 12th International Peat Congress, Tampere, Finland 6–11 Jun 2004, Vol 2*, pp. 1010–1014, 2004.
- Pitkänen, A., Turunen, J., Tahvanainen, T., and Simola, H.: Carbon storage change in a partially forestry-drained boreal mire determined through peat column inventories. *Boreal Environ. Res.*, 18, 223–234, [www.borenv.net/BER/pdfs/ber18/ber18-223.pdf](http://www.borenv.net/BER/pdfs/ber18/ber18-223.pdf), 2013.
- 255 Regina, K., Nykänen, H., Maljanen, M., Silvola, J., and Martikainen, P. J.: Emissions of N<sub>2</sub>O and NO and net nitrogen mineralization in a boreal forested peatland treated with different nitrogen compounds. *Can. J. For. Res.*, 28, 132–140, <https://doi.org/10.1139/x97-198>, 1998.
- Repola, J.: Biomass equations for birch in Finland. *Silva Fenn.*, 42(4), 605–624, <https://doi.org/10.14214/sf.236>, 2008.
- 260 Repola, J.: Biomass equations for Scots pine and Norway spruce in Finland, *Silva Fenn.* 43(4), 625–647, <https://doi.org/10.14214/sf.184>, 2009.
- Saari, P., Saarnio, S., Kukkonen, J. V. K., Akkanen, J., Heinonen, J., Saari, V., and Alm, J.: DOC and N<sub>2</sub>O dynamics in upland and peatland forest soils after clear-cutting and soil preparation. *Biogeochemistry*, 94, 217–231, <https://doi.org/10.1007/s10533-009-9320-1>, 2009.
- 265 Salm, J.-O., Maddison, M., Tammik, S., Soosaar, K., Truu, J., and Mander, Ü.: Emissions of CO<sub>2</sub>, CH<sub>4</sub> and N<sub>2</sub>O from undisturbed, drained and mined peatlands in Estonia. *Hydrobiologia*, 692: 41–55, <https://doi.org/10.1007/s10750-011-0934-7>, 2012.
- Sikström, U., Björk, R. G., Ring, E., Ernfors, M., Jacobson, S., Nilsson, M., and Klemedtsson, L.: Tillförsel av aska i skog på dikad torvmark i södra Sverige. Effekter på skogsproduktion, flöden av

- 270 växthusgaser, torvegenskaper, markvegetation och grundvattenkemi. VÄRMEFORSK Service AB, Stockholm, 75 pp., 2009.
- Silvola, J., Alm, J., Ahlholm, U., Nykänen, H., and Martikainen, P. J.: CO<sub>2</sub> fluxes from peat in boreal mires under varying temperature and moisture conditions. *J. Ecol.*, 84, 219–228, <https://www.jstor.org/stable/pdf/2261357.pdf>, 1996.
- 275 Simola, H., Pitkänen, A., and Turunen, J.: Carbon loss in drained forestry peatlands in Finland, estimated by re-sampling peatlands surveyed in the 1980s. *Eur. J. Soil Sci.*, 63, 798–807, <https://doi.org/10.1111/j.1365-2389.2012.01499.x>, 2012.
- Uri, V., Kukumägi, M., Aosaar, J., Varik, M., Becker, H., Morozov, G., and Karoles, K.: Ecosystems carbon budgets of differently aged downy birch stands growing on well-drained peatlands. *Forest Ecol. Manag.*, 399, 82–93, <https://doi.org/10.1016/j.foreco.2017.05.023>, 2017.
- 280 Weslien, P., Kasimir Klemedtsson, Å., Börjesson, G., and Klemedtsson, L.: Strong pH influence on N<sub>2</sub>O and CH<sub>4</sub> fluxes from forested organic soils. *Eur. J. Soil Sci.*, 60, 311–320, <https://doi.org/10.1111/j.1365-2389.2009.01123.x>, 2009.
- von Arnold, K., Hånell, B., Stendahl, J., and Klemedtsson, L.: Greenhouse gas fluxes from drained organic forestland in Sweden. *Scand. J. For. Res.*, 20, 400–411, <https://doi.org/10.1080/02827580500281975>, 2005c.
- von Arnold, K., Nilsson, M., Hånell, B., Weslien, P., and Klemedtsson, L.: Fluxes of CO<sub>2</sub>, CH<sub>4</sub> and N<sub>2</sub>O from drained organic soils in deciduous forests. *Soil Biol. Biochem.*, 37, 1059–1071, <https://doi.org/10.1016/j.soilbio.2004.11.004>, 2005a.
- 290 von Arnold, K., Weslien, P., Nilsson, M., Svensson, B. H., and Klemedtsson, L.: Fluxes of CO<sub>2</sub>, CH<sub>4</sub> and N<sub>2</sub>O from drained coniferous forests on organic soils. *Forest Ecol. Manage.*, 210, 239–254, <https://doi.org/10.1016/j.foreco.2005.02.031>, 2005b.
- Väisänen, S. E., Silvan, N. R., Ihalainen, A. V. J., and Soukka, R. M.: Peat production in high-emission level peatlands – key to reduce climatic impacts? *Energ. Environ.*, 24, 757–778, <https://doi.org/10.1260/0958-305X.24.5.757>, 2013.
- 295 Yamulki, S., Anderson, R., Peace, A., and Morison, J. I. L.: Soil CO<sub>2</sub>, CH<sub>4</sub> and N<sub>2</sub>O fluxes from an afforested lowland raised peatbog in Scotland: implications for drainage and restoration. *Biogeosciences*, 10, 1051–1065, <https://doi.org/10.5194/bg-10-1051-2013>, 2013.



300 **S2. Summary of EFs in categories formed, summary of environment parameters in categories formed, and soil annual GHG balance correlations with climatic parameters and site type characteristics.**

**Table S2-1. Data composition in different EF categories and category application in analyses.**

| <b>Category abbreviation</b> | <b>Data composition</b>                                                                                                                                                                                                                                                                                                                                                                                                | <b>Use in analyses</b>                                                                                           |
|------------------------------|------------------------------------------------------------------------------------------------------------------------------------------------------------------------------------------------------------------------------------------------------------------------------------------------------------------------------------------------------------------------------------------------------------------------|------------------------------------------------------------------------------------------------------------------|
| Temperate                    | IPCC (2014) assessment pooled all data from the temperate zone. This data includes drained organic forest soils data from more site type specific categories (NuP, NuR, AF_AG, and Other organic soils) in the temperate zone.                                                                                                                                                                                         | Comparison with IPCC (2014) EFs.                                                                                 |
| FAO                          | IPCC (2014) applied this category for data from low productivity drained forest land, including shrubland and drained land that may not be classified as forest and nutrient-poor sites fulfilling minimum criteria in the FAO forest definition (FRA, 2015) in the boreal zone. Content is comparable with the data from forestry drained low productivity nutrient poor sites in the boreal zone (Low_NuP category). | Comparison with IPCC (2014) EFs.                                                                                 |
| NuP                          | IPCC (2014) used this category for data from nutrient poor sites in the boreal zone. Category is comparable with more site type specific categories of forestry drained typical productivity nutrient poor sites (Typical_NuP) and afforested peat extraction sites (AF_PE). In this study, NuP category is available both for boreal and temperate zone data.                                                         | Comparison with IPCC (2014) EFs, included in more site type specific EF categories, and in correlation analyses. |
| NuR                          | IPCC (2014) used this category for data from nutrient rich sites in the boreal zone. Category is comparable with pooled data from forestry drained low- and typical productivity nutrient rich sites (Low_NuR, Typical_NuR), and afforested agricultural sites (AF_AG). In this study, NuR category is available both for boreal and temperate zone data.                                                              | Comparison with IPCC (2014) EFs, included in more site type specific EF categories, and correlation analyses.    |
| Low_NuR                      | Data from forestry drained low productivity nutrient rich sites. Category is applied to the boreal zone data.                                                                                                                                                                                                                                                                                                          | Included in more site type specific EF categories, and in correlation analyses.                                  |
| Low_NuP                      | Data is from forestry drained low productivity nutrient poor sites fulfilling minimum criteria in the FAO forest definition (FRA, 2015). In this study, this category is applied to the boreal zone data.                                                                                                                                                                                                              | Included in more site type specific EF categories, and correlation analyses.                                     |
| Typical NuR                  | Data is from forestry drained typical productivity nutrient rich sites. In this study, Typical NuR category is available both for boreal and temperate zone data.                                                                                                                                                                                                                                                      | Included in more site type specific EF categories, and in correlation analyses.                                  |

|                  |                                                                                                                                                                                                         |                                                                                 |
|------------------|---------------------------------------------------------------------------------------------------------------------------------------------------------------------------------------------------------|---------------------------------------------------------------------------------|
| Typical NuP      | Data is from forestry drained typical productivity nutrient poor sites. In this study, Typical NuP category is available both for boreal and temperate zone data.                                       | Included in more site type specific EF categories, and in correlation analyses. |
| AF_AG            | Data is from afforested agriculture lands. In this study, AF_AG category is available both for boreal and temperate zone data.                                                                          | Included in more site type specific EF categories.                              |
| AF_PE            | Data is from afforested peat extraction sites. Category is applied to the boreal zone data.                                                                                                             | Included in more site type specific EF categories.                              |
| Other org. soils | Data is from forests growing on soils fulfilling organic soils definition but not defined as peat. Category is applied to the temperate zone data.                                                      | Included in more site type specific EF categories.                              |
| Extremely poor   | Data is from forestry drained low productivity forests on extremely nutrient poor sites. These sites fulfil minimum forest criteria as in FAO (FRA, 2015). Category is applied to the boreal zone data. | Included in more site type specific EF categories, and in correlation analyses. |
| Poor             | Data is from forestry drained low productivity forests on nutrient poor sites. Ground vegetation is 'shrubby'. Category is applied to the boreal zone data.                                             | Included in more site type specific EF categories, and in correlation analyses. |
| Moderately rich  | Data is from forestry drained typical productivity forests on nutrient rich sites. Ground vegetation is 'shrubby'. Category applied to the boreal zone data.                                            | Included in more site type specific EF categories, and in correlation analyses. |
| Rich             | Data is from forestry drained typical productivity forests on nutrient rich sites. Ground vegetation is rich with herbs and/or ferns. Category is applied to the boreal zone data.                      | Included in more site type specific EF categories, and in correlation analyses. |

**Table S2-2. Drained organic forest soil emission factors (EFs) in this study applied on categories used in IPCC 2014 for boreal and temperate zones. Averages, their 95% confidence intervals and number of observations (i.e. number of sites) in the category (N) are shown.**

| Forest site type and climate zone                                                                                                                                                                                                                              | EF CO <sub>2</sub> (g m <sup>-2</sup> y <sup>-1</sup> ) |            |     | EF CH <sub>4</sub> (g m <sup>-2</sup> y <sup>-1</sup> ) |              |    | EF N <sub>2</sub> O (g m <sup>-2</sup> y <sup>-1</sup> ) |                |    |
|----------------------------------------------------------------------------------------------------------------------------------------------------------------------------------------------------------------------------------------------------------------|---------------------------------------------------------|------------|-----|---------------------------------------------------------|--------------|----|----------------------------------------------------------|----------------|----|
|                                                                                                                                                                                                                                                                | Ave <sup>(2)</sup>                                      | 95% CI     | N   | Ave <sup>(2)</sup>                                      | 95% CI       | N  | Ave <sup>(2)</sup>                                       | 95% CI         | N  |
| Forest land, drained, including shrubland and drained land that may not be classified as forest <sup>(1)</sup> and nutrient-poor sites in boreal zone                                                                                                          | 100                                                     | -38 – 238  | 64  | –                                                       |              |    | –                                                        |                |    |
| Nutrient-rich sites in boreal zone                                                                                                                                                                                                                             | 242                                                     | 109 – 375  | 111 | 0.32                                                    | -0.06 – 0.69 | 86 | 0.570                                                    | 0.306 – 0.834  | 53 |
| Nutrient-poor sites in boreal zone                                                                                                                                                                                                                             | 56                                                      | -118 – 230 | 43  | 0.52                                                    | 0.14 – 0.89  | 29 | 0.192                                                    | 0.069 – 0.316  | 21 |
| All sites in temperate zone                                                                                                                                                                                                                                    | 698                                                     | 536 – 861  | 35  | 0.31                                                    | -0.08 – 1.11 | 26 | 0.828                                                    | -0.022 – 1.678 | 22 |
| <sup>(1)</sup> Sites with poor tree growth (due to extremely low nutrient availability, nutrient imbalance or wetness, but still fulfilling the minimum criteria as in FAO's Forest Resources Assessment (FRA, 2015).<br><sup>(2)</sup> Based on weighed means |                                                         |            |     |                                                         |              |    |                                                          |                |    |

310 **Table S2-3. CO<sub>2</sub>, CH<sub>4</sub> and N<sub>2</sub>O EFs (g m<sup>-2</sup> y<sup>-1</sup>) in drained organic forest soils in temperate and boreal climate zones in different site type categories. CO<sub>2</sub> estimates are presented by pooled flux data and inventory data, and separately for these two data types for more site specific categories. Data from each measuring site was pooled if multiple GHG flux estimates were available.**

| Inventory and flux data combined |                           |                        |                              |          |                                                           |         |          |         |         |         |                |                                                                                  |
|----------------------------------|---------------------------|------------------------|------------------------------|----------|-----------------------------------------------------------|---------|----------|---------|---------|---------|----------------|----------------------------------------------------------------------------------|
| Climate zone                     | Productivity <sup>1</sup> | Site type <sup>2</sup> | Nutrient status <sup>3</sup> | N groups | CO <sub>2</sub> soil (g m <sup>-2</sup> a <sup>-1</sup> ) |         | Min.     | Max.    | CI.95%  | CI.95%  | Tot. estimates | Reference (number of GHG estimates from publication) <sup>4</sup>                |
|                                  |                           |                        |                              |          | Mean                                                      | S.D.    |          |         |         |         |                |                                                                                  |
| Boreal                           | Low                       | FO                     | NuR                          | 9        | 83,93                                                     | 120,85  | -450,77  | 655,36  | -152,94 | 320,79  | 10             | 45(9), 54(1)                                                                     |
|                                  |                           | FO                     | NuP                          | 10       | 269,22                                                    | 194,92  | -509,70  | 1549,56 | -112,82 | 651,26  | 11             | 28(1), 30(1), 39(1), 45(5), 49(1), 51(1), 54(1)                                  |
|                                  | Typical                   | FO                     | NuR                          | 96       | 260,34                                                    | 70,00   | -1357,87 | 2881,63 | 123,14  | 397,54  | 103            | 28(10), 30(2), 31(4), 32(3), 33(1), 36&37(55), 44(9), 45(9), 49(3), 51(1), 54(6) |
|                                  |                           | FO                     | NuP                          | 29       | 79,17                                                     | 95,99   | -1110,84 | 1722,08 | -108,97 | 267,31  | 37             | 14(1), 28(2), 30(1), 31(1), 36&37(13), 44(8), 45(6), 53(1), 54(4)                |
|                                  |                           | AF_AG                  |                              | 7        | 68,21                                                     | 285,17  | -1229,80 | 920,00  | -490,72 | 627,14  | 7              | 13(1), 34(6)                                                                     |
|                                  | AF_PM                     |                        | 6                            | -86,12   | 247,34                                                    | -814,48 | 740,27   | -570,90 | 398,66  | 6       | 34(6)          |                                                                                  |
| Temperate                        | Typical                   | FO                     | NuR                          | 15       | 591,38                                                    | 85,85   | -30,00   | 1074,33 | 423,10  | 759,65  | 16             | 15(1), 31(1), 42(3), 46(5), 48(3), 52(3)                                         |
|                                  |                           | FO                     | NuP                          | 4        | 534,95                                                    | 78,13   | 423,01   | 762,99  | 381,81  | 688,08  | 5              | 43(3), 50(2)                                                                     |
|                                  |                           | AF_AG                  |                              | 4        | 932,31                                                    | 270,26  | 555,87   | 1267,35 | 402,60  | 1462,02 | 9              | 10(2), 27(1), 43(6)                                                              |
|                                  |                           | Other org. soils       |                              | 3        | 959,98                                                    | 351,07  | 462,34   | 1689,67 | 271,88  | 1648,08 | 5              | 1(4), 22(1)                                                                      |

| Inventory data |                           |                        |                              |          |                                                           |        |          |         |         |        |                |                                                                   |
|----------------|---------------------------|------------------------|------------------------------|----------|-----------------------------------------------------------|--------|----------|---------|---------|--------|----------------|-------------------------------------------------------------------|
| Climate zone   | Productivity <sup>1</sup> | Site type <sup>2</sup> | Nutrient status <sup>3</sup> | N groups | CO <sub>2</sub> soil (g m <sup>-2</sup> a <sup>-1</sup> ) |        | Min.     | Max.    | CI.95%  | CI.95% | Tot. estimates | Reference (number of GHG estimates from publication) <sup>4</sup> |
|                |                           |                        |                              |          | Mean                                                      | S.D.   |          |         |         |        |                |                                                                   |
| Boreal         | Low                       | FO                     | NuR                          | 8        | 133,68                                                    | 125,18 | -450,77  | 655,36  | -111,66 | 379,03 | 9              | 45(9)                                                             |
|                |                           | FO                     | NuP                          | 8        | 369,11                                                    | 227,05 | -1110,84 | 1722,08 | -75,90  | 814,12 | 8              | 28(1), 30(1), 39(1), 45(5)                                        |
|                | Typical                   | FO                     | NuR                          | 21       | 343,70                                                    | 216,22 | -1357,87 | 2881,63 | -80,09  | 767,48 | 21             | 28(10), 30(2), 45(9)                                              |
|                |                           | FO                     | NuP                          | 9        | 42,29                                                     | 294,51 | -1110,84 | 1722,08 | -534,95 | 619,52 | 9              | 28(2), 30(1), 45(6)                                               |
|                |                           | AF_AG                  |                              |          |                                                           |        |          |         |         |        |                |                                                                   |
|                | AF_PM                     |                        |                              |          |                                                           |        |          |         |         |        |                |                                                                   |
| Temperate      | Typical                   | FO                     | NuR                          | 1        | -30,00                                                    |        |          |         |         |        | 1              | 15(1)                                                             |
|                |                           | FO                     | NuP                          |          |                                                           |        |          |         |         |        |                |                                                                   |
|                |                           | AF_AG                  |                              |          |                                                           |        |          |         |         |        |                |                                                                   |
|                |                           | Other org. soils       |                              |          |                                                           |        |          |         |         |        |                |                                                                   |

315

| Flux data    |                           |                        |                              |          |                                                           |         |          |         |         |         |                |                                                                   |
|--------------|---------------------------|------------------------|------------------------------|----------|-----------------------------------------------------------|---------|----------|---------|---------|---------|----------------|-------------------------------------------------------------------|
| Climate zone | Productivity <sup>1</sup> | Site type <sup>2</sup> | Nutrient status <sup>3</sup> | N groups | CO <sub>2</sub> soil (g m <sup>-2</sup> a <sup>-1</sup> ) |         | Min.     | Max.    | CI.95%  | CI.95%  | Tot. estimates | Reference (number of GHG estimates from publication) <sup>4</sup> |
|              |                           |                        |                              |          | Mean                                                      | S.D.    |          |         |         |         |                |                                                                   |
| Boreal       | Low                       | FO                     | NuR                          | 1        | -319,23                                                   |         |          |         |         |         | 1              | 54(1)                                                             |
|              |                           | FO                     | NuP                          | 2        | -204,77                                                   | 168,90  | -194,33  | 12,75   | -535,81 | 126,27  | 2              | 49(1), 51(1)                                                      |
|              | Typical                   | FO                     | NuR                          | 76       | 211,17                                                    | 56,07   | -790,94  | 2570,00 | 101,26  | 321,07  | 82             | 31(4), 32(3), 33(1), 36&37(55), 44(9), 49(3), 51(1), 54(6)        |
|              |                           | FO                     | NuP                          | 21       | 85,57                                                     | 64,89   | -397,22  | 627,21  | -41,62  | 212,75  | 28             | 14(1), 31(1), 36&37(13), 44(8), 53(1), 54(4)                      |
|              |                           | AF_AG                  |                              | 7        | 68,21                                                     | 285,17  | -1229,80 | 920,00  | -490,72 | 627,14  | 7              | 13(1), 34(6)                                                      |
|              | AF_PM                     |                        | 6                            | -86,12   | 247,34                                                    | -814,48 | 740,27   | -570,90 | 398,66  | 6       | 34(6)          |                                                                   |
| Temperate    | Typical                   | FO                     | NuR                          | 14       | 636,43                                                    | 78,75   | 140,00   | 1074,33 | 482,08  | 790,78  | 15             | 31(1), 42(3), 46(5), 48(3), 52(3)                                 |
|              |                           | FO                     | NuP                          | 4        | 534,95                                                    | 78,13   | 423,01   | 762,99  | 381,81  | 688,08  | 5              | 43(3), 50(2)                                                      |
|              |                           | AF_AG                  |                              | 4        | 932,31                                                    | 270,26  | 555,87   | 1267,35 | 402,60  | 1462,02 | 9              | 10(2), 27(1), 43(6)                                               |
|              |                           | Other org. soils       |                              | 3        | 959,98                                                    | 351,07  | 462,34   | 1689,67 | 271,88  | 1648,08 | 5              | 1(4), 22(1)                                                       |

| CH <sub>4</sub> (g m <sup>-2</sup> a <sup>-1</sup> ) |                           |                        |                              |          |                                                      |       |       |       |        |        |                |                                                                                                                 |
|------------------------------------------------------|---------------------------|------------------------|------------------------------|----------|------------------------------------------------------|-------|-------|-------|--------|--------|----------------|-----------------------------------------------------------------------------------------------------------------|
| Climate zone                                         | Productivity <sup>1</sup> | Site type <sup>2</sup> | Nutrient status <sup>3</sup> | N groups | CH <sub>4</sub> (g m <sup>-2</sup> a <sup>-1</sup> ) |       | Min.  | Max.  | CI.95% | CI.95% | Tot. estimates | Reference (number of GHG estimates from publication) <sup>4</sup>                                               |
|                                                      |                           |                        |                              |          | Mean                                                 | S.D.  |       |       |        |        |                |                                                                                                                 |
| Boreal                                               | Low                       | FO                     | NuR                          | 2        | 2,76                                                 | 2,21  |       |       | -1,58  | 7,09   | 2              | 18(1), 54(1)                                                                                                    |
|                                                      |                           | FO                     | NuP                          | 3        | 2,48                                                 | 0,58  | -0,28 | 3,47  | 1,34   | 3,61   | 13             | 11(9), 21(2), 49(1), 54(1)                                                                                      |
|                                                      | Typical                   | FO                     | NuR                          | 79       | 0,36                                                 | 0,21  | -0,97 | 12,50 | -0,05  | 0,76   | 105            | 9(4), 11(9), 12(2), 16(1), 18(2), 19(1), 21(4), 23(1), 25(12), 29(3), 33(1), 35(1), 36(55), 41(3), 49(3), 54(3) |
|                                                      |                           | FO                     | NuP                          | 24       | 0,63                                                 | 0,22  | -0,28 | 3,47  | 0,19   | 1,06   | 35             | 14(1), 18(2), 21(4), 23(1), 29(1), 35(8), 36(13), 53(1), 54(4)                                                  |
|                                                      |                           | AF_AG                  |                              | 7        | -0,11                                                | 0,11  | -0,32 | 0,26  | -0,33  | 0,11   | 8              | 34(8)                                                                                                           |
|                                                      | AF_PM                     |                        | 5                            | -0,04    | 0,01                                                 | -0,07 | -0,03 | -0,06 | -0,03  | 5      | 34(5)          |                                                                                                                 |
| Temperate                                            | Typical                   | FO                     | NuR                          | 12       | 1,03                                                 | 0,63  | -0,64 | 5,64  | -0,20  | 2,26   | 20             | 4(1), 7(3), 42(3), 48(6), 52(7)                                                                                 |
|                                                      |                           | FO                     | NuP                          | 4        | 0,94                                                 | 0,21  | 0,69  | 1,25  | 0,53   | 1,35   | 5              | 43(3), 50(2)                                                                                                    |
|                                                      |                           | AF_AG                  |                              | 5        | -0,33                                                | 0,08  | -0,47 | -0,08 | -0,49  | -0,18  | 14             | 10(2), 27(3), 43(6), 47(3)                                                                                      |
|                                                      |                           | Other org. soils       |                              | 5        | 0,07                                                 | 0,05  | -0,05 | 0,20  | -0,02  | 0,16   | 7              | 1(4), 3(1), 22(1), 26(1)                                                                                        |

| N <sub>2</sub> O (g m <sup>-2</sup> a <sup>-1</sup> ) |                           |                        |                              |          |                                                       |      |      |      |        |        |                |                                                                                    |
|-------------------------------------------------------|---------------------------|------------------------|------------------------------|----------|-------------------------------------------------------|------|------|------|--------|--------|----------------|------------------------------------------------------------------------------------|
| Climate zone                                          | Productivity <sup>1</sup> | Site type <sup>2</sup> | Nutrient status <sup>3</sup> | N groups | N <sub>2</sub> O (g m <sup>-2</sup> a <sup>-1</sup> ) |      | Min. | Max. | CI.95% | CI.95% | Tot. estimates | Reference (number of GHG estimates from publication) <sup>4</sup>                  |
|                                                       |                           |                        |                              |          | Mean                                                  | S.D. |      |      |        |        |                |                                                                                    |
| Boreal                                                | Low                       | FO                     | NuR                          | 3        | 0,12                                                  | 0,03 | 0,08 | 0,19 | 0,06   | 0,19   | 3              | 18(1), 24(1), 54(1)                                                                |
|                                                       |                           | FO                     | NuP                          | 2        | 0,07                                                  | 0,04 | 0,03 | 0,11 | -0,01  | 0,14   | 4              | 21(2), 49(1), 54(1)                                                                |
|                                                       | Typical                   | FO                     | NuR                          | 42       | 0,34                                                  | 0,11 | 0,02 | 2,90 | 0,14   | 0,55   | 52             | 9(4), 17(1), 18(2), 19(1), 21(4), 24(4), 33(1), 36(22), 40(1), 41(3), 49(3), 54(6) |
|                                                       |                           | FO                     | NuP                          | 15       | 0,14                                                  | 0,07 | 0,01 | 1,14 | -0,01  | 0,28   | 21             | 14(1), 18(2), 21(4), 24(4), 36(6), 54(4)                                           |
|                                                       |                           | AF_AG                  |                              | 11       | 1,38                                                  | 0,41 | 0,11 | 3,46 | 0,57   | 2,20   | 23             | 20(20), 34(2), 38(1)                                                               |
|                                                       | AF_PM                     |                        | 6                            | 0,35     | 0,12                                                  | 0,08 | 0,75 | 0,11 | 0,59   | 10     | 20(8), 34(2)   |                                                                                    |
| Temperate                                             | Typical                   | FO                     | NuR                          | 10       | 1,26                                                  | 0,93 | 0,00 | 9,52 | -0,56  | 3,08   | 18             | 2(1), 4(1), 42(3), 48(6), 52(7)                                                    |
|                                                       |                           | FO                     | NuP                          | 1        | 0,08                                                  |      |      |      |        |        | 1              | 50(1)                                                                              |
|                                                       |                           | AF_AG                  |                              | 7        | 0,75                                                  | 0,44 | 0,15 | 3,23 | -0,11  | 1,61   | 25             | 5(2), 6(5), 8(4), 10(2), 27(3), 43(6), 47(3)                                       |
|                                                       |                           | Other org. soils       |                              | 4        | 0,16                                                  | 0,08 | 0,02 | 0,33 | 0,01   | 0,31   | 6              | 1(4), 3(1), 22(1)                                                                  |

<sup>1</sup> 'Low' refers to sites with poor tree growth (due to extremely low nutrient availability, nutrient imbalance or wetness, but still fulfilling the minimum criteria as in FAO's FRA, 2015), and 'Typical' refers to forests with typical tree growth for forestry practices.

320

<sup>2</sup> FO includes forestry drained sites, AF\_AG includes afforested sites used previously in agriculture, AF\_PE includes afforested sites used previously for peat extraction.

325 <sup>3</sup> NuP includes nutrient poor site types (often indicated by ombrotrophy), and NuR includes nutrient rich site types (often indicated by minerotrophy, or caused by fertilization)

<sup>4</sup> References are listed in S1

Publications in the assessment; (1) Ball et al., 2007; (2) Brumme et al., 1999; (3) Christiansen et al., 2012; (4) Danevčič et al., 2010; (5) Eickenscheidt et al., 2014; (6) Ernfors et al., 2011; (7) Glenn et al., 330 1993; (8) Holz et al., 2016; (9) Huttunen et al., 2003a; (10) Klemedtsson et al., 2010; (11) Komulainen et al., 1998; (12) Korkiakoski et al., 2017; (13) Lohila et al., 2007; (14) Lohila et al., 2011; (15) Lupikis and Lazdins 2017; (16) Maljanen et al., 2003a; (17) Maljanen et al., 2003b; (18) Maljanen et al., 2006; (19) Maljanen et al., 2010; (20) Maljanen et al., 2012; (21) Maljanen et al., 2014; (22) Mander et al., 2008; (23) Martikainen et al., 1992; (24) Martikainen et al., 1993; (25) Martikainen et al., 1995b; (26) 335 McNamara et al., 2008; (27) Meyer et al., 2013; (28) Minkkinen and Laine 1998; (29) Minkkinen and Laine 2006; (30) Minkkinen et al., 1999; (31) Minkkinen et al., 2007b; (32) Moilanen et al., 2012; (33) Mustamo et al., 2016; (34) Mäkiranta et al., 2007; (35) Nykänen et al., 1998; (36) Ojanen et al., 2010; (37) Ojanen et al., 2013; (38) Pihlatie et al., 2004; (39) Pitkänen et al., 2013; (40) Regina et al., 1998; (41) Saari et al., 2009; (42) Salm et al., 2012; (43) Sikström et al., 2009; (44) Silvola et al., 1996; (45) 340 Simola et al., 2012; (46) Uri et al., 2017; (47) Weslien et al., 2009; (48) von Arnold et al., 2005a; (49) Väisänen et al., 2013; (50) Yamulki et al., 2013; (51) Komulainen et al., 1999; (52) von Arnold et al. 2005b; (53) Minkkinen et al., 2018; (54) Ojanen et al., 2019. These publications are listed as references in S1.

345 **Table S2-4. ANOVA test for significance (p) in separate univariate linear mixed model for each covariate, and marginal coefficient of determination (pseudo-R<sup>2</sup>) of those models.**

| Predictor                                    | unit / categories                                         | CO <sub>2</sub> |                | CH <sub>4</sub> |                | N <sub>2</sub> O |                |
|----------------------------------------------|-----------------------------------------------------------|-----------------|----------------|-----------------|----------------|------------------|----------------|
|                                              |                                                           | p               | R <sup>2</sup> | p               | R <sup>2</sup> | p                | R <sup>2</sup> |
| Nutrient status                              | 'NuP', 'NuR'                                              | 0.157           | 0.019          | <b>0.004</b>    | 0.067          | 0.108            | 0.036          |
| Nutrient status                              | 'Extremely poor',<br>'Poor', 'Moderately<br>rich', 'Rich' | 0.163           | 0.053          | <b>0.001</b>    | 0.212          | 0.531            | 0.059          |
| Soil C                                       | %                                                         | <b>0.001</b>    | 0.308          | 0.393           | 0.019          | 0.192            | 0.046          |
| Soil N                                       | %                                                         | 0.445           | 0.015          | <b>0.000</b>    | 0.282          | <b>0.011</b>     | 0.134          |
| Soil C:N                                     |                                                           | <b>0.000</b>    | 0.125          | <b>0.040</b>    | 0.047          | 0.051            | 0.081          |
| Soil P                                       | mg kg <sup>-1</sup>                                       | 0.463           | 0.053          | <b>0.025</b>    | 0.083          | 0.316            | 0.057          |
| Soil P:N                                     |                                                           | 0.466           | 0.051          | 0.629           | 0.002          | 0.542            | 0.015          |
| Soil bulk density                            | g cm <sup>-3</sup>                                        | <b>0.045</b>    | 0.037          | 0.423           | 0.004          | <b>0.005</b>     | 0.041          |
| Soil pH                                      |                                                           | 0.320           | 0.034          | 0.575           | 0.007          | <b>0.037</b>     | 0.107          |
| Forest productivity                          | 'Typical', 'Low'                                          | 0.123           | 0.024          | <b>0.002</b>    | 0.126          | 0.429            | 0.009          |
| Productivity and soil nu-<br>trient status   | 'Typical NuP', 'Low<br>NuP', 'Typical NuR',<br>'Low NuR'  | 0.433           | 0.030          | <b>0.001</b>    | 0.195          | 0.393            | 0.054          |
| Stand type                                   | 'Conifer', 'Deciduous',<br>'Mixed'                        | <b>0.000</b>    | 0.208          | <b>0.050</b>    | 0.030          | <b>0.003</b>     | 0.073          |
| Shrubbyness                                  | 'No', 'Yes'                                               | 0.050           | 0.033          | 0.507           | 0.003          | 0.550            | 0.005          |
| Basal area of trees                          | m <sup>2</sup> ha <sup>-1</sup>                           | 0.826           | 0.005          | <b>0.011</b>    | 0.200          | <b>0.000</b>     | 0.360          |
| Stand volume of trees                        | m <sup>3</sup> ha <sup>-1</sup>                           | 0.511           | 0.004          | <b>0.000</b>    | 0.220          | <b>0.029</b>     | 0.090          |
| Stem number of trees                         | stems ha <sup>-1</sup>                                    | 0.815           | 0.004          | <b>0.002</b>    | 0.331          | <b>0.000</b>     | 0.286          |
| Climate zone                                 | 'Boreal', 'Temperate'                                     | <b>0.001</b>    | 0.087          | 0.183           | 0.014          | 0.051            | 0.060          |
| Altitude                                     | m                                                         | 0.422           | 0.005          | <b>0.002</b>    | 0.073          | 0.313            | 0.015          |
| Southward distance from<br>polar circle      | km                                                        | <b>0.003</b>    | 0.073          | 0.467           | 0.003          | <b>0.000</b>     | 0.149          |
| Mean temperature of<br>measurement year      | °C                                                        | <b>0.039</b>    | 0.037          | <b>0.010</b>    | 0.048          | 0.155            | 0.026          |
| Temperature sum                              | degree days                                               | <b>0.006</b>    | 0.050          | 0.140           | 0.013          | 0.740            | 0.001          |
| February mean tempera-<br>ture               | °C                                                        | 0.242           | 0.010          | <b>0.008</b>    | 0.035          | 0.912            | 0.000          |
| July mean temperature                        | °C                                                        | <b>0.020</b>    | 0.028          | 0.649           | 0.001          | <b>0.049</b>     | 0.029          |
| Mean temperature over<br>30 years            | °C                                                        | <b>0.005</b>    | 0.067          | 0.624           | 0.002          | <b>0.004</b>     | 0.101          |
| Temperature sum over 30<br>years             | degree days                                               | 0.326           | 0.009          | <b>0.006</b>    | 0.053          | 0.414            | 0.010          |
| February mean tempera-<br>ture over 30 years | °C                                                        | <b>0.009</b>    | 0.062          | 0.608           | 0.002          | <b>0.024</b>     | 0.066          |
| July mean temperature<br>over 30 years       | °C                                                        | 0.076           | 0.026          | <b>0.014</b>    | 0.034          | <b>0.000</b>     | 0.233          |
| Precipitation during<br>measurement year     | mm y <sup>-1</sup>                                        | 0.524           | 0.003          | 0.421           | 0.004          | <b>0.000</b>     | 0.100          |
| Mean precipitation over<br>30 years          | mm y <sup>-1</sup>                                        | <b>0.024</b>    | 0.055          | 0.545           | 0.003          | <b>0.000</b>     | 0.144          |

Note that the R<sup>2</sup> values are not comparable between covariates, because the models may be based on very different subsets of the data depending on the availability of covariates.

350 **Table S2-5. Multiple linear model parameter estimates with standard errors (SE) and marginal coefficient of determination (pseudo-R<sup>2</sup>) for N<sub>2</sub>O obtained from stepwise regression by including two vegetation characterizing predictors and one soil parameter. The p-values for the significance of the difference of the parameter estimate from 0 are based on Wald tests, and the numbers of data points (n) and sites (n<sub>sites</sub>) used for the model are also indicated.**

| Predictor                           | unit / category                 | Estimate | SE    | p     | n  | n <sub>sites</sub> | R <sup>2</sup> |
|-------------------------------------|---------------------------------|----------|-------|-------|----|--------------------|----------------|
| <b><u>log(N<sub>2</sub>O+ε)</u></b> |                                 |          |       |       |    |                    | 0.83           |
| pH                                  |                                 | -0.474   | 0.208 | 0.048 | 21 | 11                 |                |
| Stand type                          | Conifer <sup>(a)</sup>          | 0        |       |       |    |                    |                |
|                                     | Deciduous                       | 0.503    | 0.297 | 0.124 |    |                    |                |
|                                     | Mixed                           | 0.668    | 0.147 | 0.000 |    |                    |                |
| Stand volume of trees               | m <sup>3</sup> ha <sup>-1</sup> | 0.003    | 0.001 | 0.003 |    |                    |                |

<sup>(a)</sup> The reference category

**Table S2-6. Selected soil and water parameters and tree stand characteristics (mean  $\pm$  S.D.) in typical and low productivity site type categories (data in Data repository). Note that parameters are infrequently reported in publications and thus are only indicative for the site types.**

| Parameter                     | Climate zone | Site productivity | Site type        | Mean | S.D. | Min. | Max. | N (parameter values in reports) | N (data in category) |
|-------------------------------|--------------|-------------------|------------------|------|------|------|------|---------------------------------|----------------------|
| Soil C (%)                    | Boreal       | Low               | NuP              | 47   | 2    | 45   | 51   | 4                               | 23                   |
|                               |              |                   | NuR              | 53   |      | 53   | 53   | 1                               | 12                   |
|                               |              | Typical           | NuP              | 49   | 4    | 41   | 55   | 8                               | 59                   |
|                               |              |                   | NuR              | 84   | 123  | 49   | 512  | 14                              | 161                  |
|                               |              |                   | AF_AG            | 12   |      | 12   | 12   | 1                               | 38                   |
|                               |              | AF_PE             | -                | -    | -    | -    | 0    | 21                              |                      |
|                               | Temperate    | Typical           | NuP              | 49   | 2    | 47   | 51   | 3                               | 10                   |
|                               |              |                   | NuR              | 45   | 8    | 25   | 54   | 13                              | 37                   |
|                               |              |                   | AF_AG            | 30   | 16   | 10   | 44   | 5                               | 34                   |
|                               |              |                   | Other org. soils | 33   | 18   | 15   | 50   | 3                               | 8                    |
|                               |              |                   |                  |      |      |      |      |                                 |                      |
| Soil N (%)                    | Boreal       | Low               | NuP              | 0.69 | 0.28 | 0.53 | 1.10 | 4                               | 23                   |
|                               |              |                   | NuR              | 2.03 | 0.47 | 1.70 | 2.36 | 2                               | 12                   |
|                               |              | Typical           | NuP              | 1.31 | 0.84 | 0.40 | 3.10 | 20                              | 59                   |
|                               |              |                   | NuR              | 2.18 | 0.59 | 0.90 | 3.40 | 30                              | 161                  |
|                               |              |                   | AF_AG            | 0.55 |      | 0.55 | 0.55 | 1                               | 38                   |
|                               |              | AF_PE             | -                | -    | -    | -    | 0    | 21                              |                      |
|                               | Temperate    | Typical           | NuP              | 1.51 | 0.19 | 1.38 | 1.72 | 3                               | 10                   |
|                               |              |                   | NuR              | 2.40 | 0.67 | 1.23 | 3.20 | 13                              | 37                   |
|                               |              |                   | AF_AG            | 1.92 | 0.68 | 1.10 | 2.99 | 5                               | 34                   |
|                               |              |                   | Other org. soils | 1.33 | 0.59 | 0.77 | 1.95 | 3                               | 8                    |
|                               |              |                   |                  |      |      |      |      |                                 |                      |
| Soil C/N                      | Boreal       | Low               | NuP              | 68   | 22   | 42   | 87   | 5                               | 23                   |
|                               |              |                   | NuR              | 31   |      | 31   | 31   | 1                               | 12                   |
|                               |              | Typical           | NuP              | 34   | 11   | 16   | 53   | 21                              | 59                   |
|                               |              |                   | NuR              | 28   | 22   | 16   | 205  | 70                              | 161                  |
|                               |              |                   | AF_AG            | 18   | 3    | 13   | 27   | 18                              | 38                   |
|                               |              | AF_PE             | 24               | 1    | 23   | 27   | 10   | 21                              |                      |
|                               | Temperate    | Typical           | NuP              | 33   | 3    | 30   | 34   | 3                               | 10                   |
|                               |              |                   | NuR              | 20   | 7    | 12   | 40   | 13                              | 37                   |
|                               |              |                   | AF_AG            | 20   | 7    | 8    | 25   | 8                               | 34                   |
|                               |              |                   | Other org. soils | 27   | 1    | 26   | 28   | 2                               | 8                    |
|                               |              |                   |                  |      |      |      |      |                                 |                      |
| Soil P (mg kg <sup>-1</sup> ) | Boreal       | Low               | NuP              | 567  | 115  | 500  | 700  | 3                               | 23                   |
|                               |              |                   | NuR              | 1160 |      | 1160 | 1160 | 1                               | 12                   |
|                               |              | Typical           | NuP              | 714  | 219  | 367  | 1200 | 14                              | 59                   |
|                               |              |                   | NuR              | 922  | 238  | 580  | 1340 | 17                              | 161                  |
|                               |              |                   | AF_AG            | 1659 | 807  | 500  | 2900 | 9                               | 38                   |
|                               |              | AF_PE             | 525              | 50   | 500  | 600  | 4    | 21                              |                      |
|                               | Temperate    | Typical           | NuP              | 605  | 78   | 550  | 660  | 2                               | 10                   |
|                               |              |                   | NuR              |      |      |      |      | 0                               | 37                   |
|                               |              |                   | AF_AG            | 897  | 80   | 820  | 980  | 3                               | 34                   |



|                                                         |           |         |                     |       |       |       |       |     |     |
|---------------------------------------------------------|-----------|---------|---------------------|-------|-------|-------|-------|-----|-----|
|                                                         |           |         | Other<br>org. soils | -     | -     | -     | -     | 0   | 8   |
| Soil P/N                                                | Boreal    | Low     | NuP                 | 0.104 | 0.024 | 0.089 | 0.132 | 3   | 23  |
|                                                         |           |         | NuR                 | 0.049 |       | 0.049 | 0.049 | 1   | 12  |
|                                                         |           | Typical | NuP                 | 0.069 | 0.021 | 0.041 | 0.100 | 14  | 59  |
|                                                         |           |         | NuR                 | 0.042 | 0.010 | 0.027 | 0.059 | 17  | 161 |
|                                                         |           |         | AF_AG               | 0.133 |       | 0.133 | 0.133 | 1   | 38  |
|                                                         | Temperate | Typical | AF_PE               | -     | -     | -     | -     | 0   | 21  |
|                                                         |           |         | NuP                 | 0.043 | 0.006 | 0.039 | 0.048 | 2   | 10  |
|                                                         |           |         | NuR                 |       |       |       |       | 0   | 37  |
|                                                         |           |         | AF_AG               | 0.043 | 0.014 | 0.027 | 0.054 | 3   | 34  |
|                                                         |           |         | Other<br>org. soils | -     | -     | -     | -     | 0   | 8   |
| WT annual<br>(cm)                                       | Boreal    | Low     | NuP                 | -24   | -11   | 10    | -36   | 12  | 23  |
|                                                         |           |         | NuR                 | -34   | -34   |       | -34   | 1   | 12  |
|                                                         |           | Typical | NuP                 | -29   | -11   | 11    | -58   | 35  | 59  |
|                                                         |           |         | NuR                 | -35   | -1    | 16    | -80   | 98  | 161 |
|                                                         |           |         | AF_AG               | -50   | -25   | 8     | -65   | 18  | 38  |
|                                                         | Temperate | Typical | AF_PE               | -60   | -50   | 14    | -84   | 11  | 21  |
|                                                         |           |         | NuP                 | -32   | -32   |       | -32   | 1   | 10  |
|                                                         |           |         | NuR                 | -30   | 1     | 18    | -65   | 22  | 37  |
|                                                         |           |         | AF_AG               | -46   | -46   |       | -46   | 1   | 34  |
|                                                         |           |         | Other<br>org. soils | -56   | -42   | 14    | -69   | 3   | 8   |
| Stem num-<br>ber (per<br>ha <sup>-1</sup> )             | Boreal    | Low     | NuP                 | -     | -     | -     | -     | 0   | 23  |
|                                                         |           |         | NuR                 | -     | -     | -     | -     | 0   | 12  |
|                                                         |           | Typical | NuP                 | 1670  |       | 1670  | 1670  | 1   | 59  |
|                                                         |           |         | NuR                 | -     | -     | -     | -     | 0   | 161 |
|                                                         |           |         | AF_AG               | -     | -     | -     | -     | 0   | 38  |
|                                                         | Temperate | Typical | AF_PE               | -     | -     | -     | -     | 0   | 21  |
|                                                         |           |         | NuP                 | 800   | 0     | 800   | 800   | 2   | 10  |
|                                                         |           |         | NuR                 | 1402  | 639   | 500   | 2752  | 12  | 37  |
|                                                         |           |         | AF_AG               | 960   | 87    | 850   | 1031  | 6   | 34  |
|                                                         |           |         | Other<br>org. soils | -     | -     | -     | -     | 0   | 8   |
| Stand vo-<br>lume (m <sup>3</sup><br>ha <sup>-1</sup> ) | Boreal    | Low     | NuP                 | 55    | 73    | 7     | 200   | 10  | 23  |
|                                                         |           |         | NuR                 | 27    | 17    | 4     | 60    | 11  | 12  |
|                                                         |           | Typical | NuP                 | 67    | 51    | 6     | 185   | 40  | 59  |
|                                                         |           |         | NuR                 | 153   | 77    | 20    | 301   | 101 | 161 |
|                                                         |           |         | AF_AG               | 80    | 66    | 2     | 193   | 18  | 38  |
|                                                         | Temperate | Typical | AF_PE               | 189   | 116   | 24    | 365   | 10  | 21  |
|                                                         |           |         | NuP                 | 110   |       | 110   | 110   | 2   | 10  |
|                                                         |           |         | NuR                 | 151   | 49    | 77    | 225   | 7   | 37  |
|                                                         |           |         | AF_AG               | 356   | 108   | 135   | 400   | 6   | 34  |
|                                                         |           |         | Other<br>org. soils | -     | -     | -     | -     | 0   | 8   |

| Basal area<br>(m <sup>2</sup> ha <sup>-1</sup> ) |           |         |                     |    |    |    |    |     |    |
|--------------------------------------------------|-----------|---------|---------------------|----|----|----|----|-----|----|
| Boreal                                           | Low       | NuP     | -                   | -  | -  | -  | -  | 0   | 23 |
|                                                  |           | NuR     | -                   | -  | -  | -  | -  | 0   | 12 |
|                                                  | Typical   | NuP     | 18                  | 1  | 17 | 18 | 2  | 59  |    |
|                                                  |           | NuR     | -                   | -  | -  | -  | 0  | 161 |    |
|                                                  |           | AF_AG   | -                   | -  | -  | -  | 0  | 38  |    |
|                                                  |           | AF_PE   | -                   | -  | -  | -  | 0  | 21  |    |
|                                                  | Temperate | Typical | NuP                 | -  | -  | -  | -  | 0   | 10 |
|                                                  |           |         | NuR                 | 31 | 21 | 2  | 67 | 12  | 37 |
|                                                  |           |         | AF_AG               | 47 | 9  | 36 | 53 | 6   | 34 |
|                                                  |           |         | Other<br>org. soils | -  | -  | -  | -  | 0   | 8  |

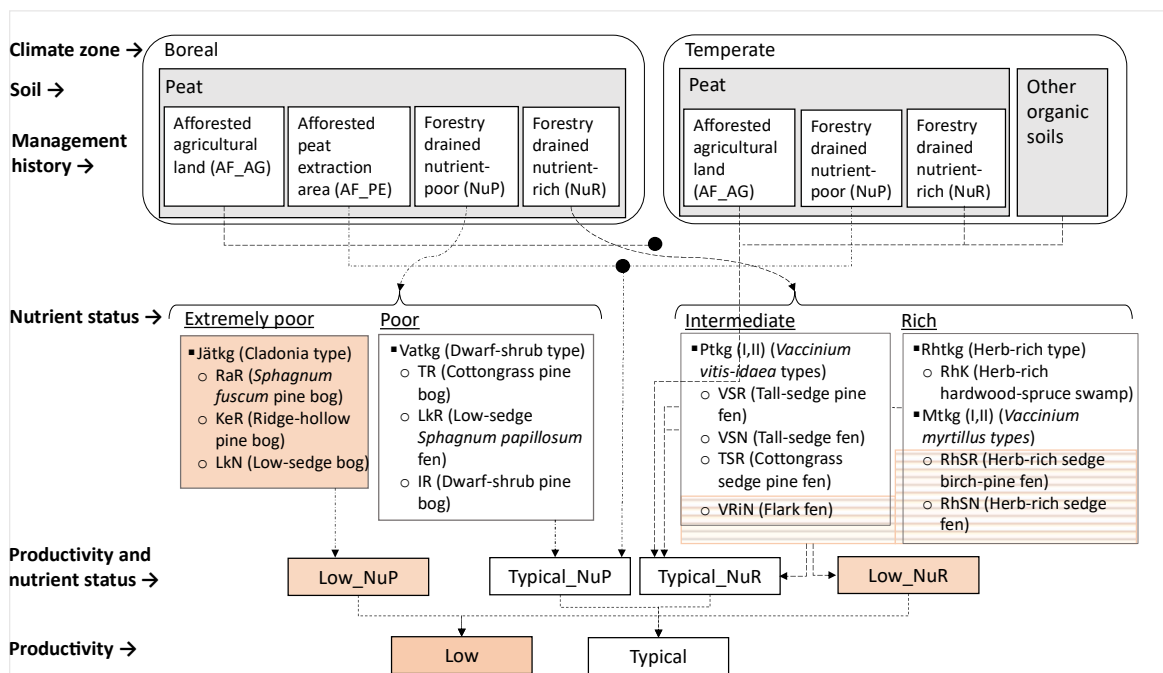

360

**Figure S2-1. Finnish forestry drained site type classification (grouping together sites with similar ecology, soil and vegetation characteristics) based on Päivänen and Hånell (2012) and added classification on climate, soil, management history and forest productivity.**

365

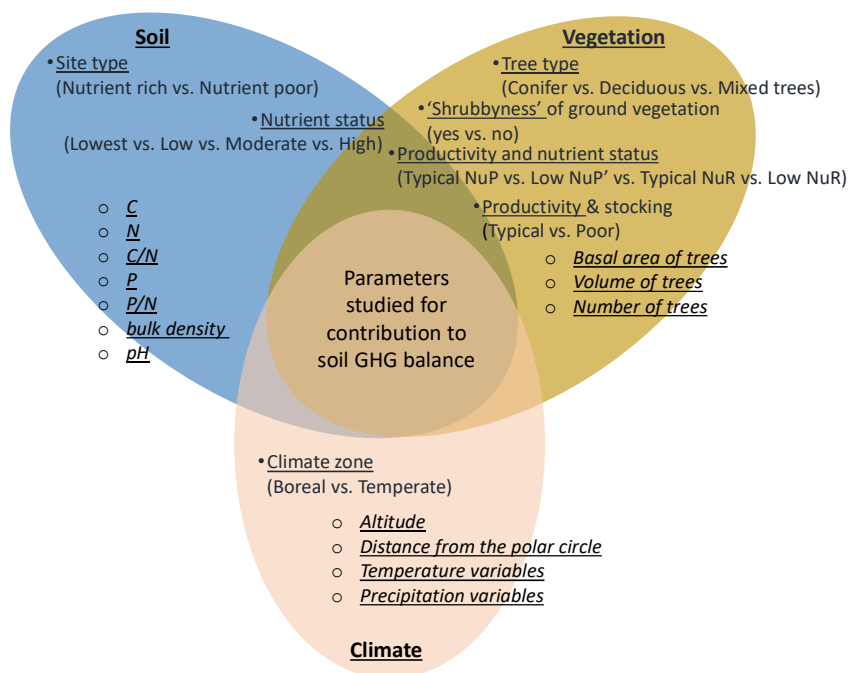

**Figure S2-2. Schematic presentation of climatic, soil and site type characteristics related parameters tested for potential correlation with soil GHG balance estimates.**

 Inventory data (low productivity)  
 Flux data (low productivity)  
 Inventory data (typical productivity)  
 Flux data (typical productivity)

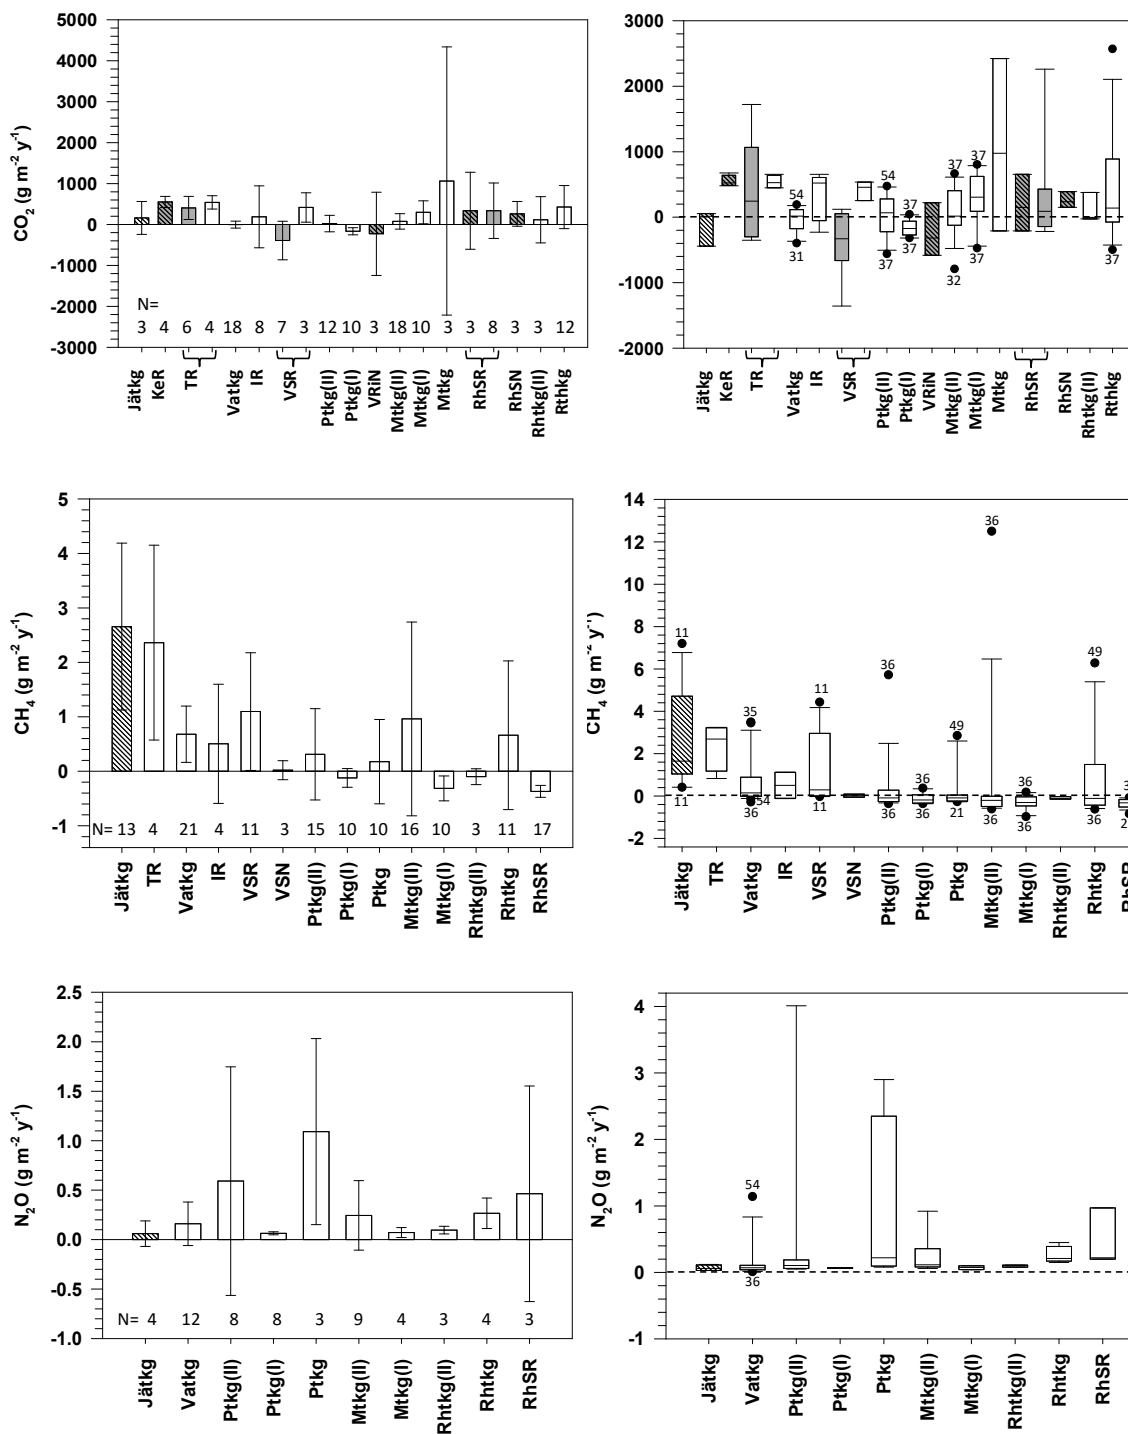

370

375

**Figure S2-3. Forestry drained peat annual CO<sub>2</sub> (top), CH<sub>4</sub> (middle) and N<sub>2</sub>O (bottom) EFs (g m<sup>-2</sup> y<sup>-1</sup>) in specific site types shown as mean ± 95% confidence intervals (left) and as box plot (right) by including data with n ≥ 3. High and low values in the box-plot graphs refer to publications listed in the tables S1-1 and S1-2. Site full names and relative positions within categories are in Figure S2-1.**

380

**References**

Päivänen, J. and Hånell, B.: Peatland ecology and forestry – a sound approach. University of Helsinki Department of Forest Sciences Publications, Vol. 3, University of Helsinki, 267 pp., 2012.
